# Supplementary material for: The Bacterial Amyloids Phenol Soluble Modulins from Staphylococcus aureus Catalyze Alpha-Synuclein Aggregation
Source: MDPI journal article supplement (doi:10.3390/ijms222111594), 2021-10-27
Supplement: s1 [file s1]

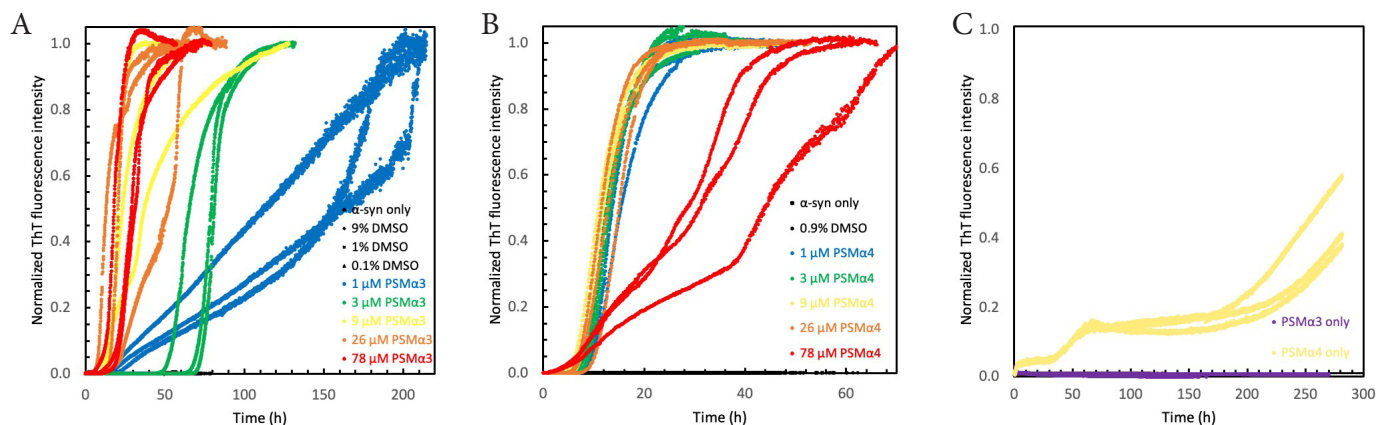

**Supplementary Figure S1. Aggregation of  $\alpha$ -syn in the presence of PSM $\alpha$  peptides.** A, B. Normalized ThT fluorescence intensity as a function of time for 25  $\mu$ M  $\alpha$ -syn in the presence of varying PSM $\alpha$ 3 (A) or PSM $\alpha$ 4 (B) concentrations as given in the respective panel. C. Control experiments with only 78  $\mu$ M PSM $\alpha$ 3 (purple) or 78  $\mu$ M PSM $\alpha$ 4 (yellow). All experiments started from monomers and were performed in 10 mM Tris, 50 mM NaCl, pH 7.6 at 37  $^{\circ}$ C under quiescent conditions.

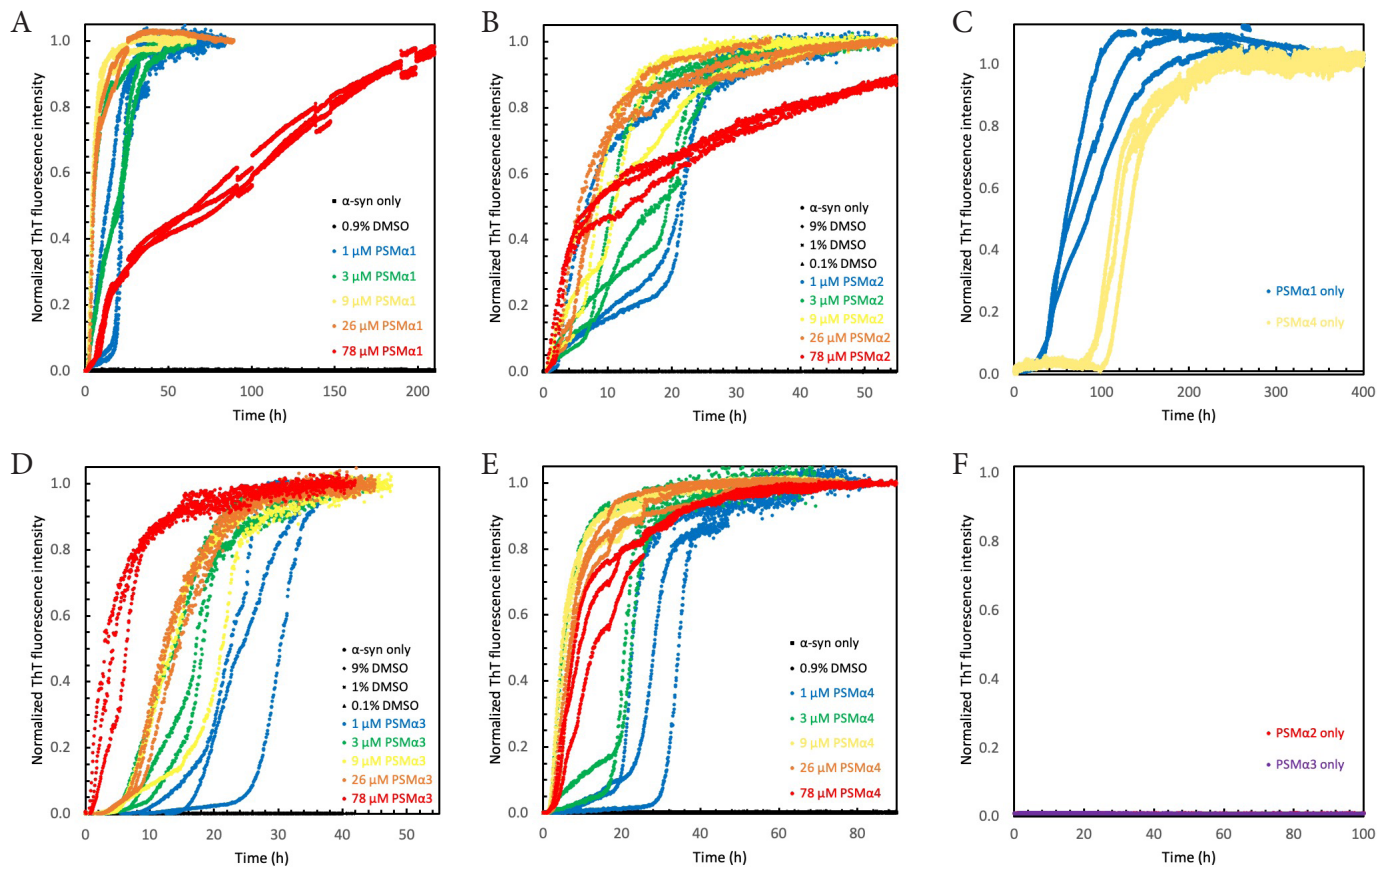

**Supplementary Figure S2. Aggregation of  $\alpha$ -syn in the presence of PSM $\alpha$  peptides. A, B, D, E.**

Normalized ThT fluorescence intensity as a function of time for 25  $\mu$ M  $\alpha$ -syn in the presence of varying PSM $\alpha$ 1 (A), PSM $\alpha$ 2 (B), PSM $\alpha$ 3 (D), or PSM $\alpha$ 4 (E) concentrations as given in the respective panel. C, F. Control experiments with only 78  $\mu$ M PSM $\alpha$ 1 (blue), PSM $\alpha$ 4 (yellow), PSM $\alpha$ 2 (red), or PSM $\alpha$ 3 (purple). All experiments started from monomers and were performed in 10 mM MES, pH 5.5 at 37  $^{\circ}$ C under quiescent conditions.



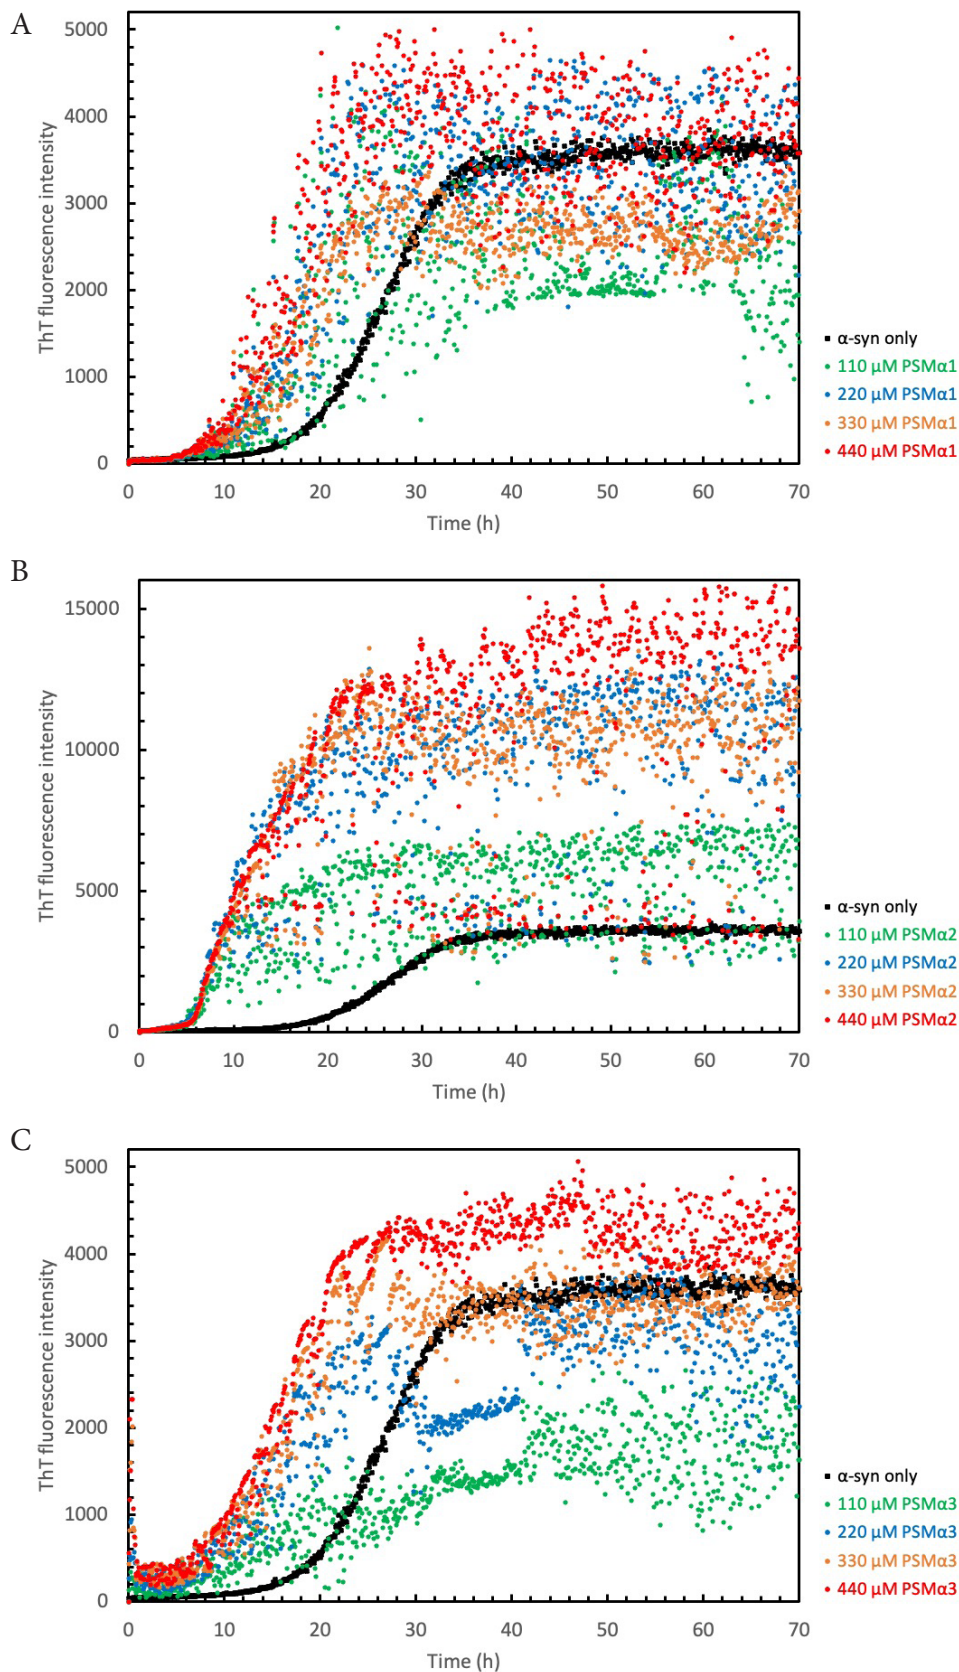

**Supplementary Figure S3. Aggregation of  $\alpha\text{-syn}$  in the presence of PSM $\alpha$  peptides.** ThT fluorescence intensity as a function of time for 50  $\mu\text{M}$   $\alpha\text{-syn}$  in the presence of varying PSM $\alpha$ 1 (A), PSM $\alpha$ 2 (B), or PSM $\alpha$ 3 (C) concentrations as given in the respective panel. All experiments started from monomers and were performed in PBS at 37  $^{\circ}\text{C}$  under quiescent conditions in polystyrene plates. Each data point is an average of 2 replicates. PSM $\alpha$  only controls for these experiments can be found in reference 22.

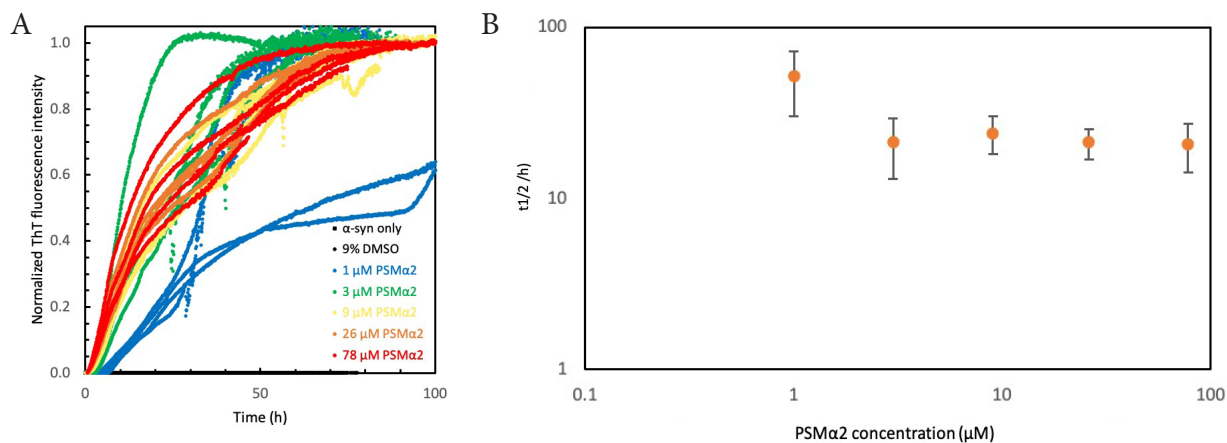

**Supplementary Figure S4. Aggregation of  $\alpha$ -syn in the presence of PSM $\alpha$ 2 peptide and excess DMSO.** A. Normalized ThT fluorescence intensity as a function of time for 25  $\mu$ M  $\alpha$ -syn aggregated in the presence of varying PSM $\alpha$ 2 concentrations ( $\mu$ M) as given in the panel. All experiments started from monomers and were performed in 10 mM Tris, 50 mM NaCl, 9% DMSO, pH 7.6 at 37 °C under quiescent conditions. B. Plot of  $t_{1/2}$  as a function of PSM $\alpha$ 2 concentration. The averages and standard deviations of 3-4 replicates are shown.

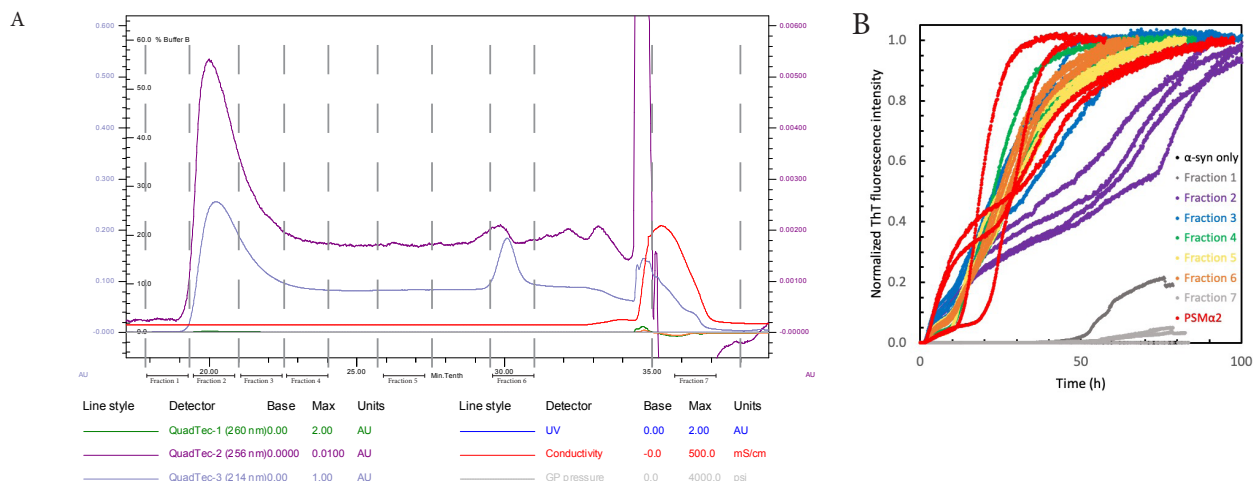

**Supplementary Figure S5. Aggregation of  $\alpha$ -syn in the presence of FPLC-purified fractions of PSM $\alpha$ 2 peptide.** PSM $\alpha$ 2 was dissolved in 6M GuHCl and purified into 10mM Tris, 50 mM NaCl, pH 7.6 using size exclusion chromatography. A. The absorbance at 214 and 256 nm was monitored and several fractions collected as indicated on the chromatogram. B. The normalized ThT fluorescence intensity as a function of time for 25  $\mu$ M  $\alpha$ -syn aggregated in the presence of the different purified PSM $\alpha$ 2 fractions or in the presence of 9  $\mu$ M non-purified PSM $\alpha$ 2 in 1.1% DMSO.

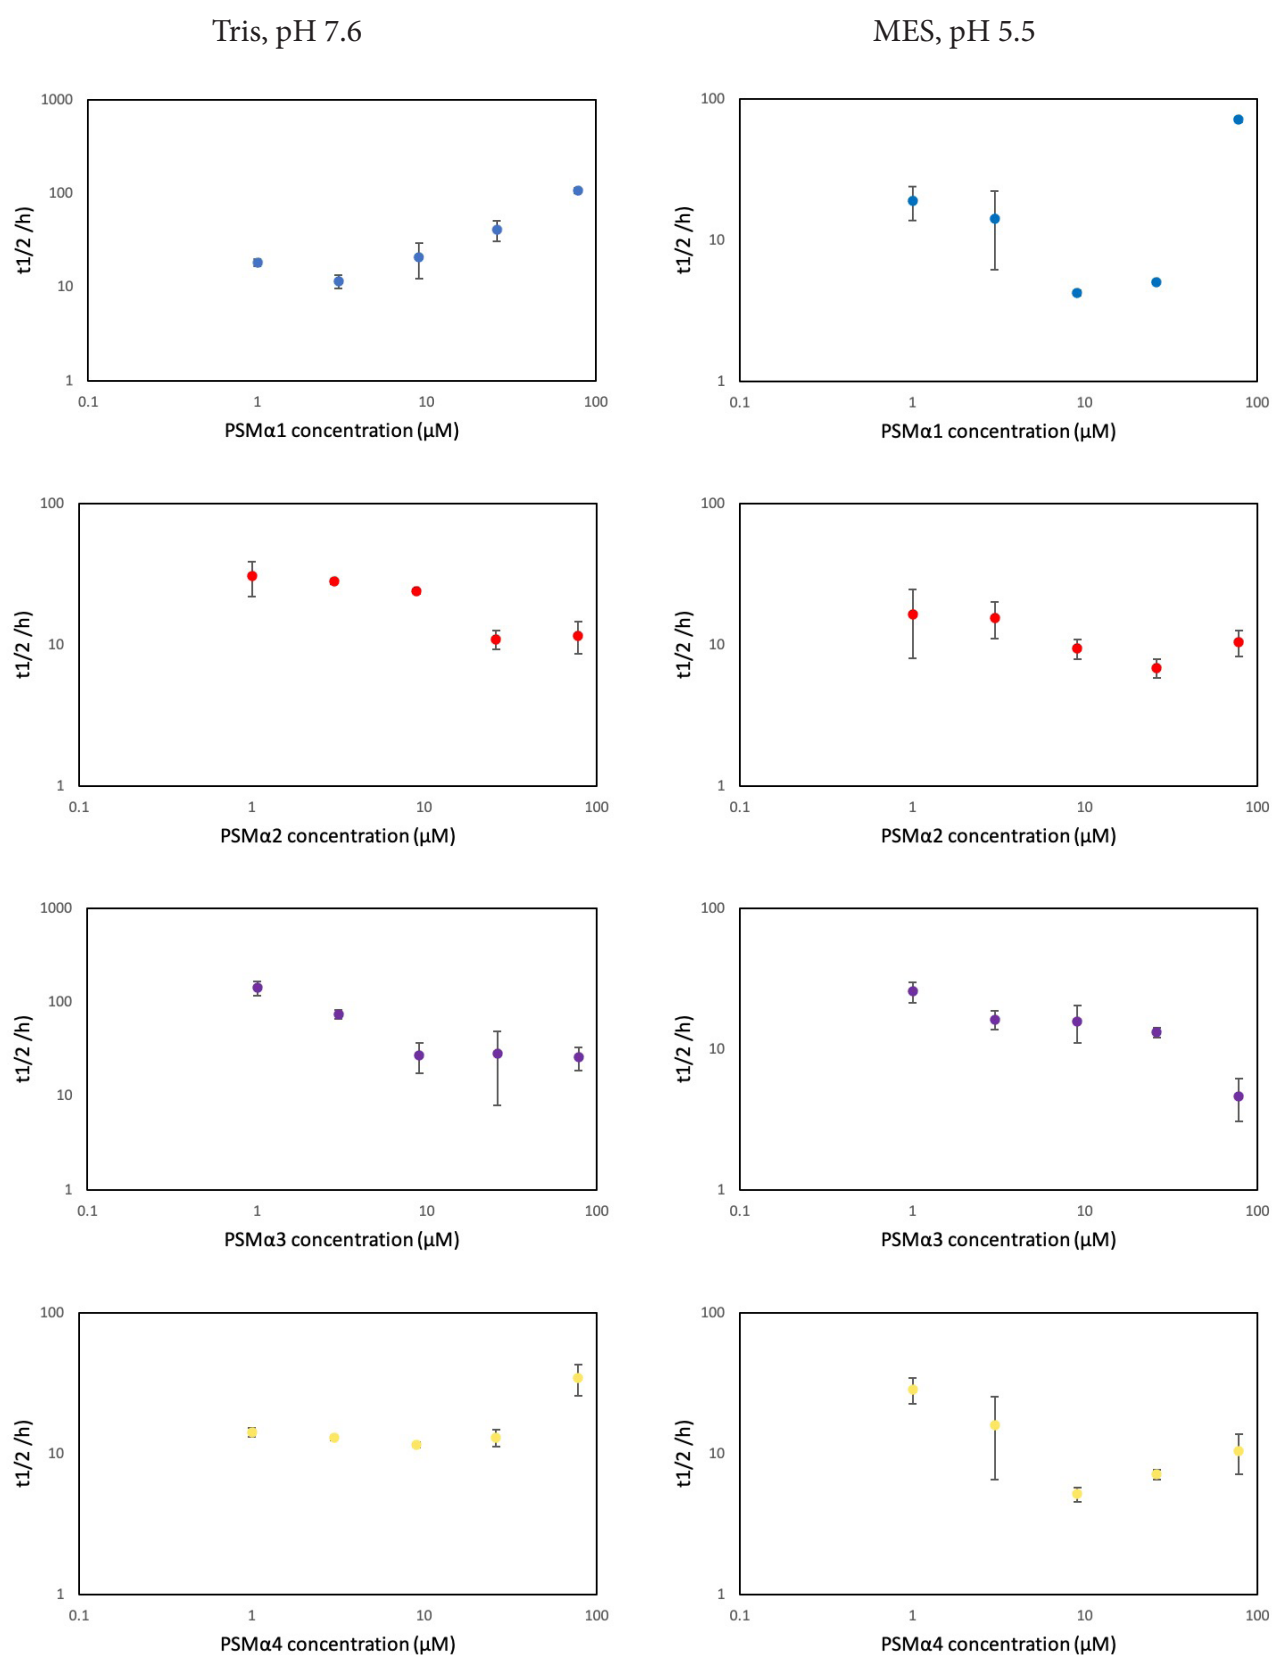

**Supplementary Figure S6. Aggregation of  $\alpha$ -syn in the presence of PSM $\alpha$  peptide in neutral and slightly acidic buffers.** Plots of  $t_{1/2}$  of 25  $\mu$ M  $\alpha$ -syn aggregated in the presence of different concentrations of PSM $\alpha$  peptides as a function of peptide concentrations in 10 mM Tris, 50 mM NaCl, pH 7.6 or in 10 mM MES, pH 5.5. The averages and standard deviations of 3-4 replicates are shown except for 26  $\mu$ M PSM $\alpha$ 1 in MES buffer which only has 2 data points.

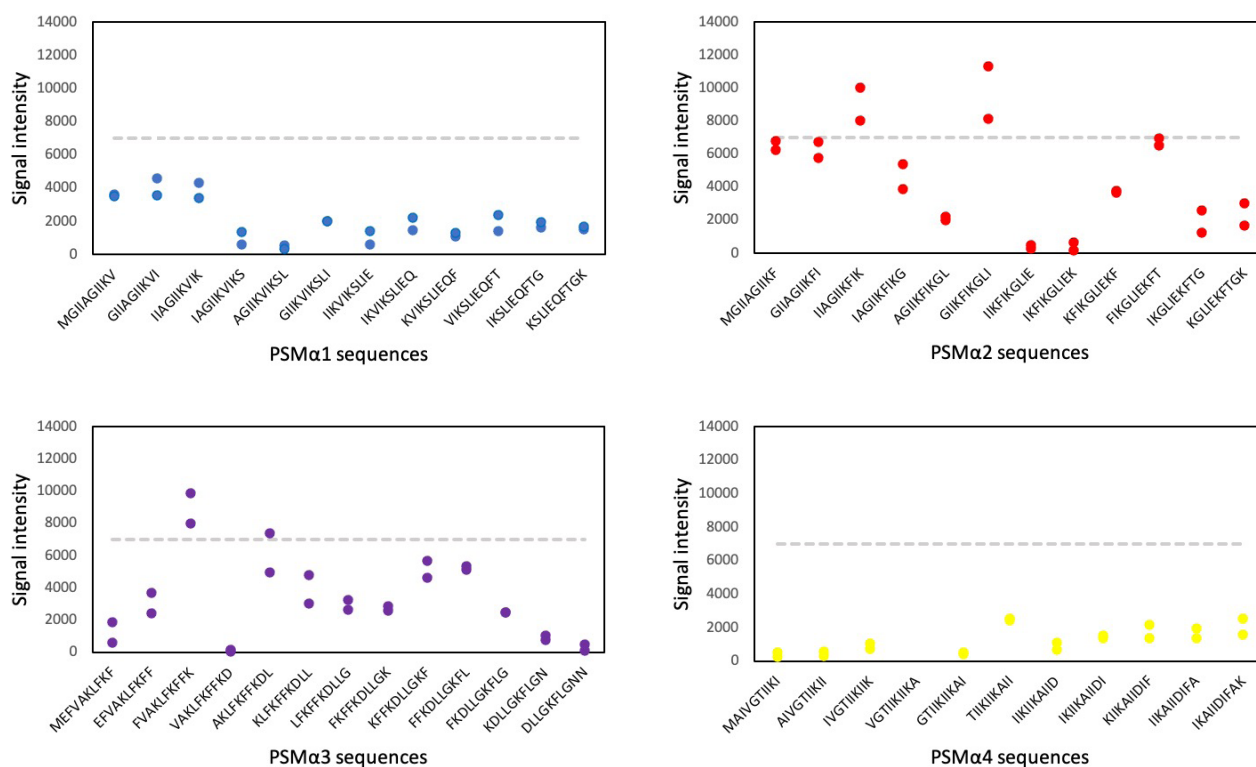

**Supplementary Figure S7. Arrays of PSMα sequences.** Alexa-fluor488-labeled- $\alpha$ -syn was added onto arrays coated with different 10-meric peptide sequences of each of the 4 studied PSMα peptides as per the figures. The signal intensity was measured and plotted for each sequence, with the dashed line at 7000 indicating the threshold value above which,  $\alpha$ -syn was deemed to bind to a peptide. Each experiment was performed twice.

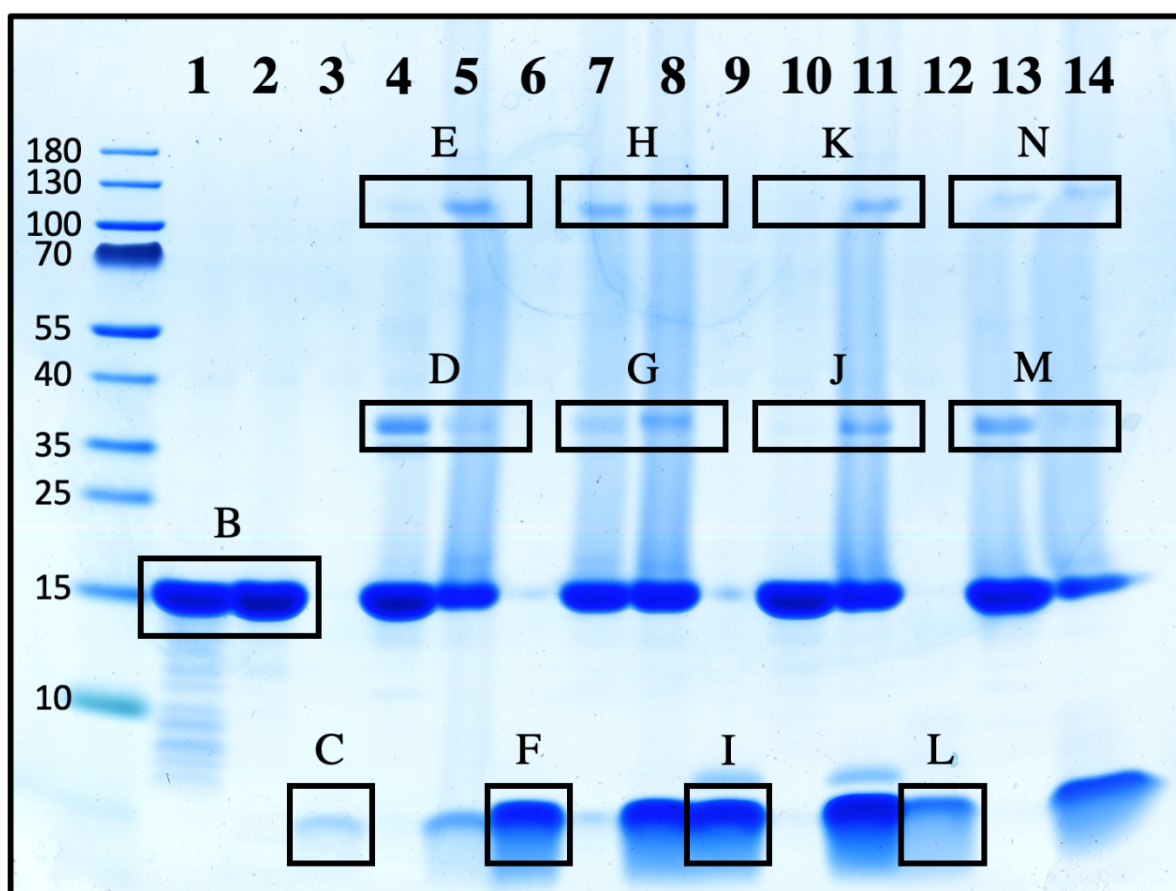

| Gel Lane | Sample                                                   | Gel band/Spectrum |
|----------|----------------------------------------------------------|-------------------|
|          | Std                                                      |                   |
| 1        | $\alpha$ -syn+ 0.9% DMSO                                 | B                 |
| 2        | $\alpha$ -syn + 9% DMSO                                  |                   |
| 3        | 77.7 $\mu$ M PSM $\alpha$ 1                              | C                 |
| 4        | 25 $\mu$ M $\alpha$ -syn + 0.97 $\mu$ M PSM $\alpha$ 1   | D and E           |
| 5        | 25 $\mu$ M $\alpha$ -syn + 77.7 $\mu$ M PSM $\alpha$ 1   | D and E           |
| 6        | 77.7 $\mu$ M PSM $\alpha$ 2                              | F                 |
| 7        | 25 $\mu$ M $\alpha$ -syn + 0.97 $\mu$ M PSM $\alpha$ 2   | G and H           |
| 8        | 25 $\mu$ M $\alpha$ -syn + 77.7 $\mu$ M PSM $\alpha$ 2   | G and H           |
| 9        | 77.7 $\mu$ M PSM $\alpha$ 3                              | I                 |
| 10       | 25 $\mu$ M $\alpha$ -syn + 0.97 $\mu$ M PSM $\alpha$ 3   | J and K           |
| 11       | 25 $\mu$ M $\alpha$ -syn + 77.7 $\mu$ M PSM $\alpha$ 3   | J and K           |
| 12       | 77.7 $\mu$ M PSM $\alpha$ 4                              | L                 |
| 13       | 25 $\mu$ M $\alpha$ -syn + 0.97 $\mu$ M PSM $\alpha$ 4 1 | M and N           |
| 14       | 25 $\mu$ M $\alpha$ -syn + 77.7 $\mu$ M PSM              | M and N           |



Gel band/ Spectrum B

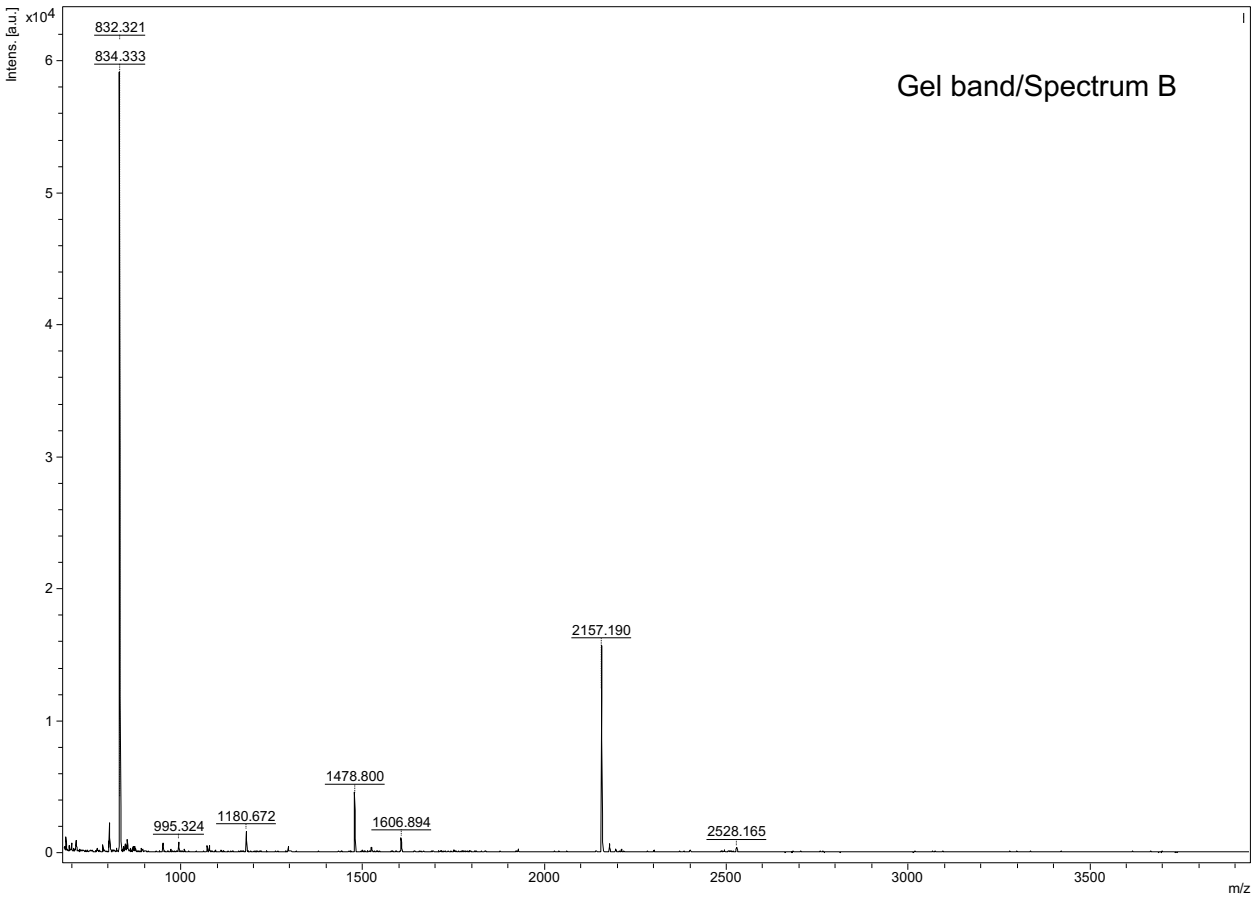

# Gel band/ Spectra C, D and E (PSM $\alpha$ 1)

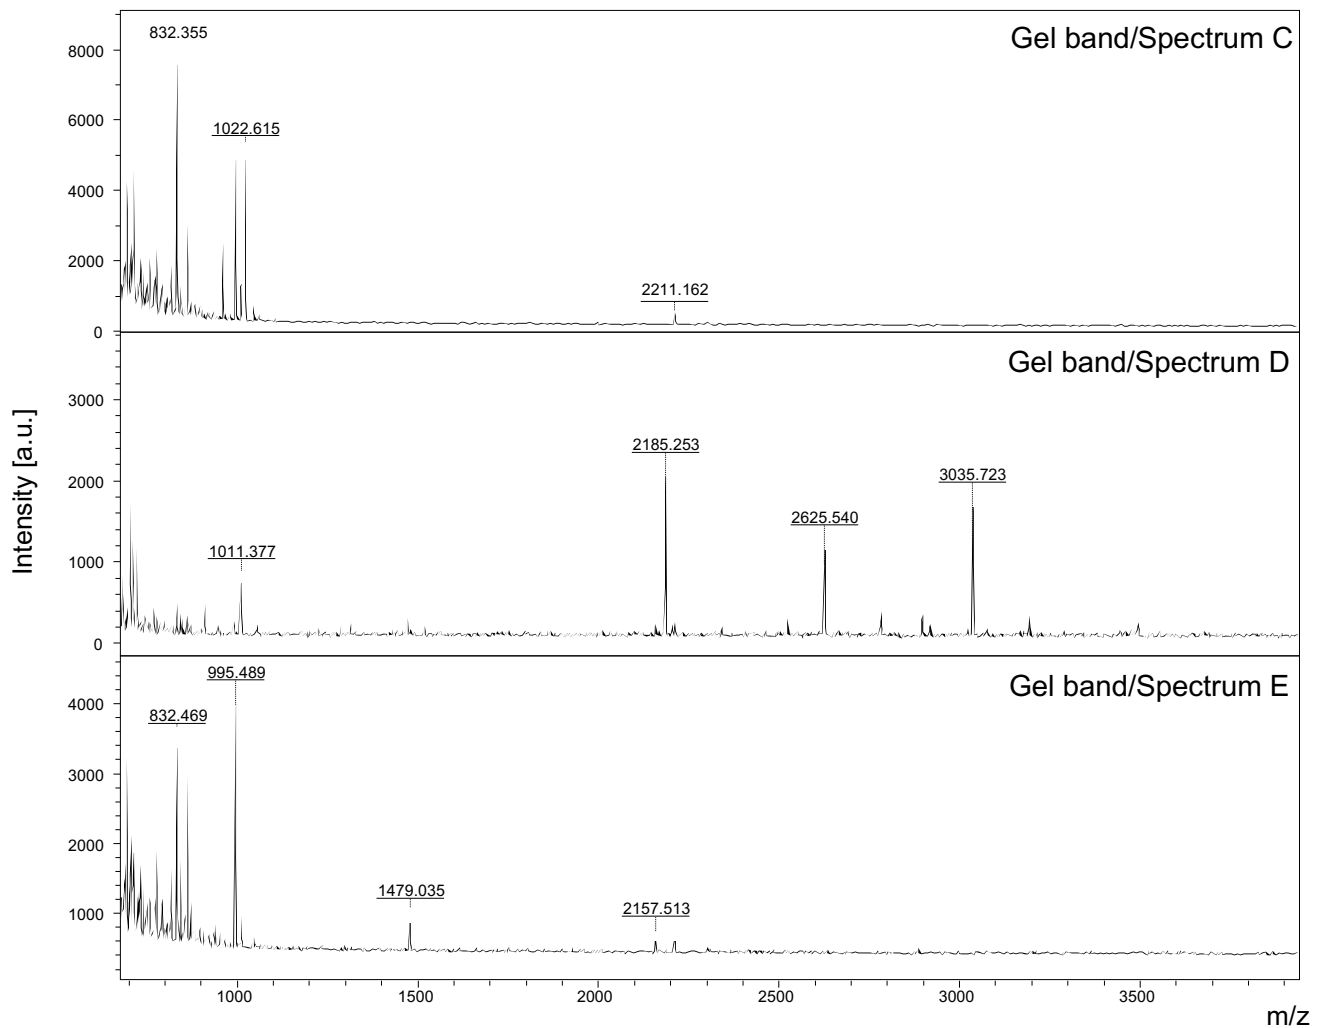

*MS spectra of in gel digested PSM $\alpha$ 1 samples. Gel band/Spectrum: C (2 kDa band), sample with 77.7  $\mu$ M PSM $\alpha$ 1; D (37 kDa band) and E (130 kDa band) sample with pooled digests of 25  $\mu$ M  $\alpha$ -syn + 0.97  $\mu$ M PSM $\alpha$ 1 and 25  $\mu$ M  $\alpha$ -syn + 77.7  $\mu$ M PSM $\alpha$ 1. The PSM $\alpha$ 1 peptide SLIEQFTGK (aa from 13 to 21) with a theoretical mass of 1022.55 Da was detected in gel band C, (see zoom on peptide in figure below)*

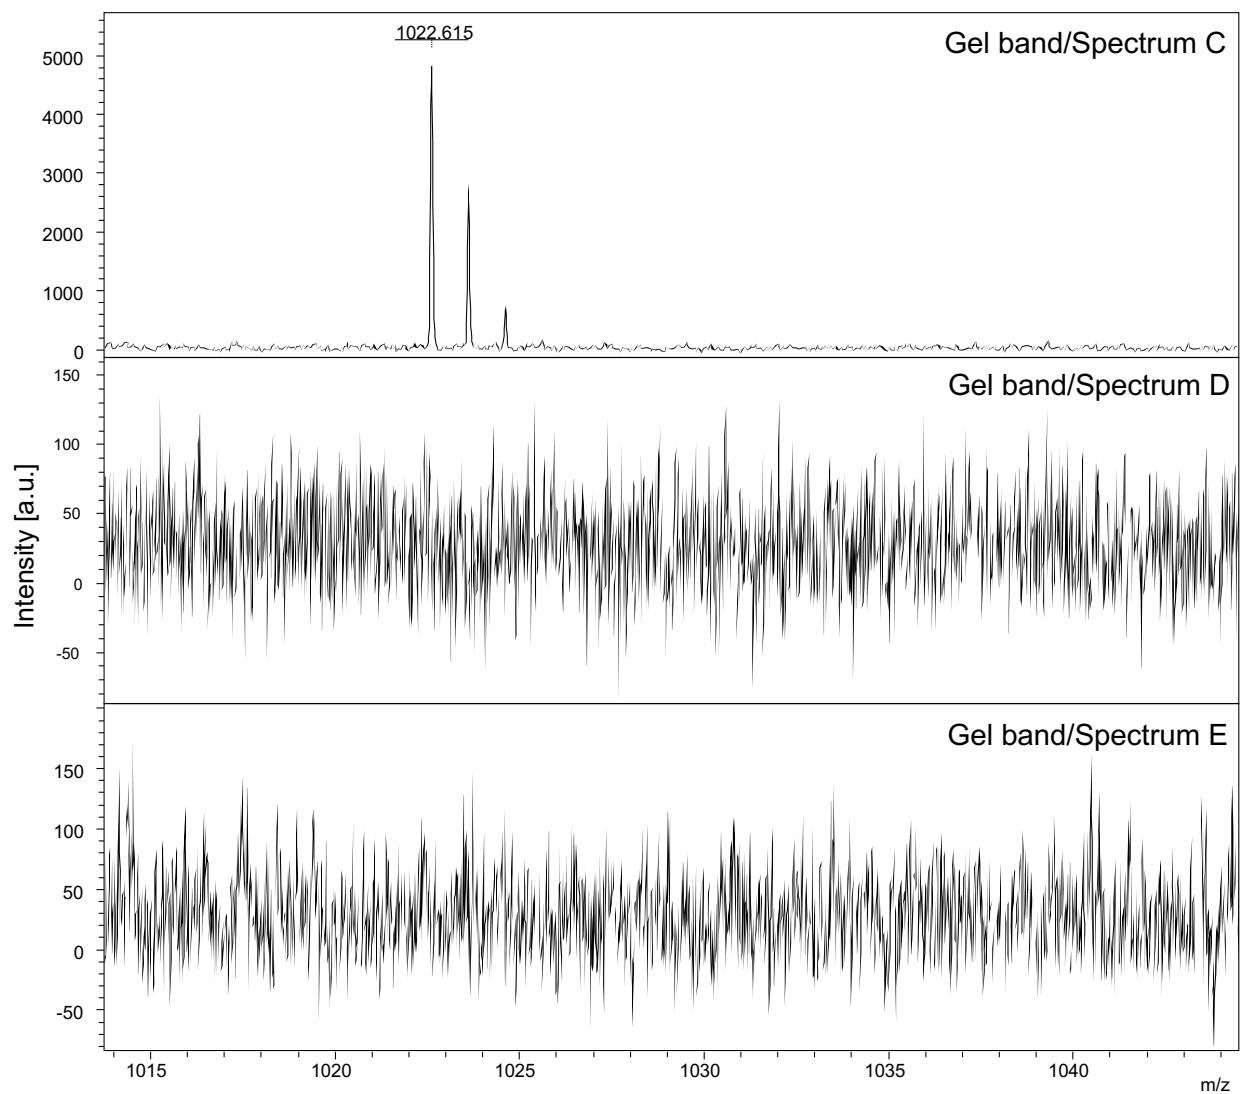

## Gel band/ Spectra F, G and H (PSM $\alpha$ 2)

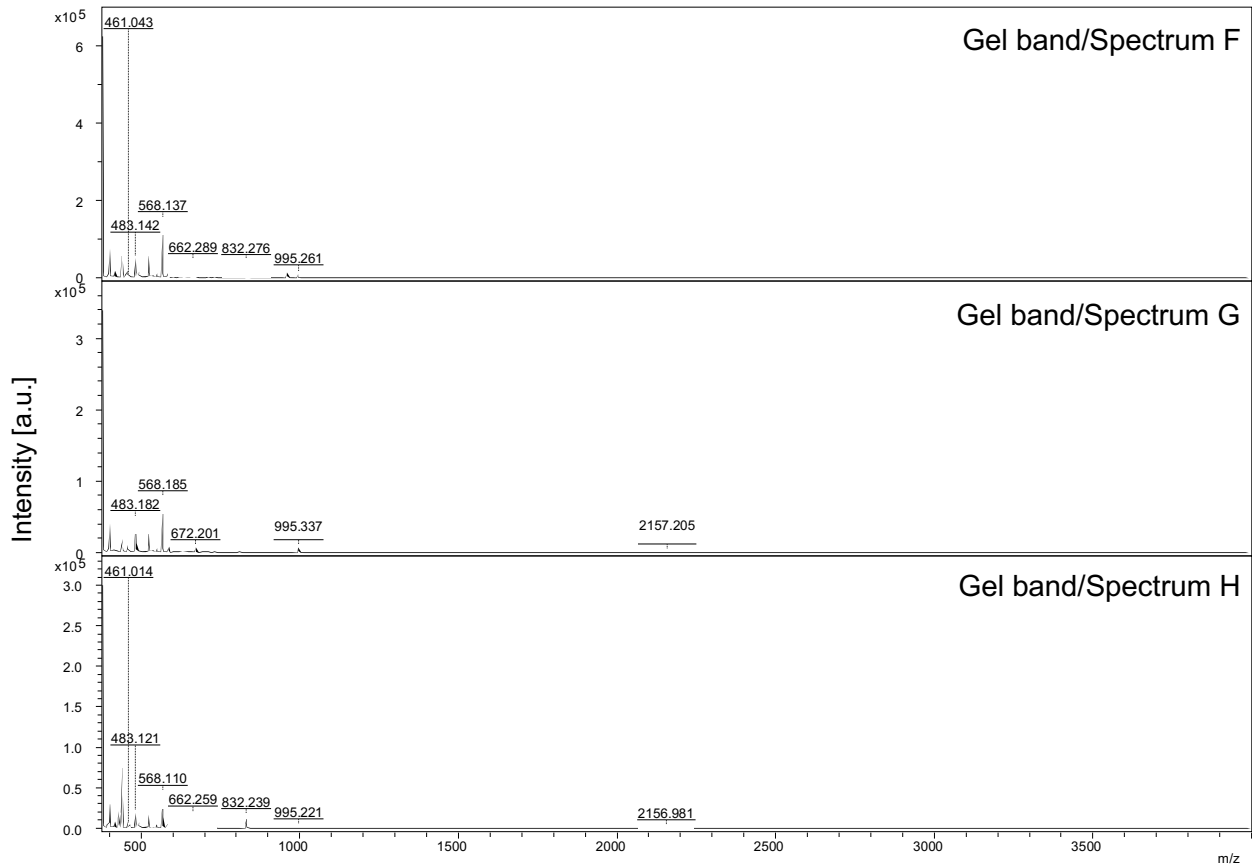

*MS spectra of in gel digested PSM $\alpha$ 2 samples. Gel band/Spectrum: F (2 kDa band), sample with 77.7  $\mu$ M PSM $\alpha$ 2; G (37 kDa band) and H (130 kDa band) sample with pooled digests of 25  $\mu$ M  $\alpha$ -syn + 0.97  $\mu$ M PSM $\alpha$ 2 and 25  $\mu$ M  $\alpha$ -syn + 77.7  $\mu$ M PSM $\alpha$ 2. The following PSM $\alpha$ 2 peptides were detected and are presented in the zoomed spectra below: FIK (aa from 10 to 12) with a theoretical mass of 407.27 Da, FTGK (aa from 18 to 21) with a theoretical mass of 452.25 Da and GLIEK (aa from 13 to 17) with a theoretical mass of 559.34.27 Da were all detected in gel band F.*

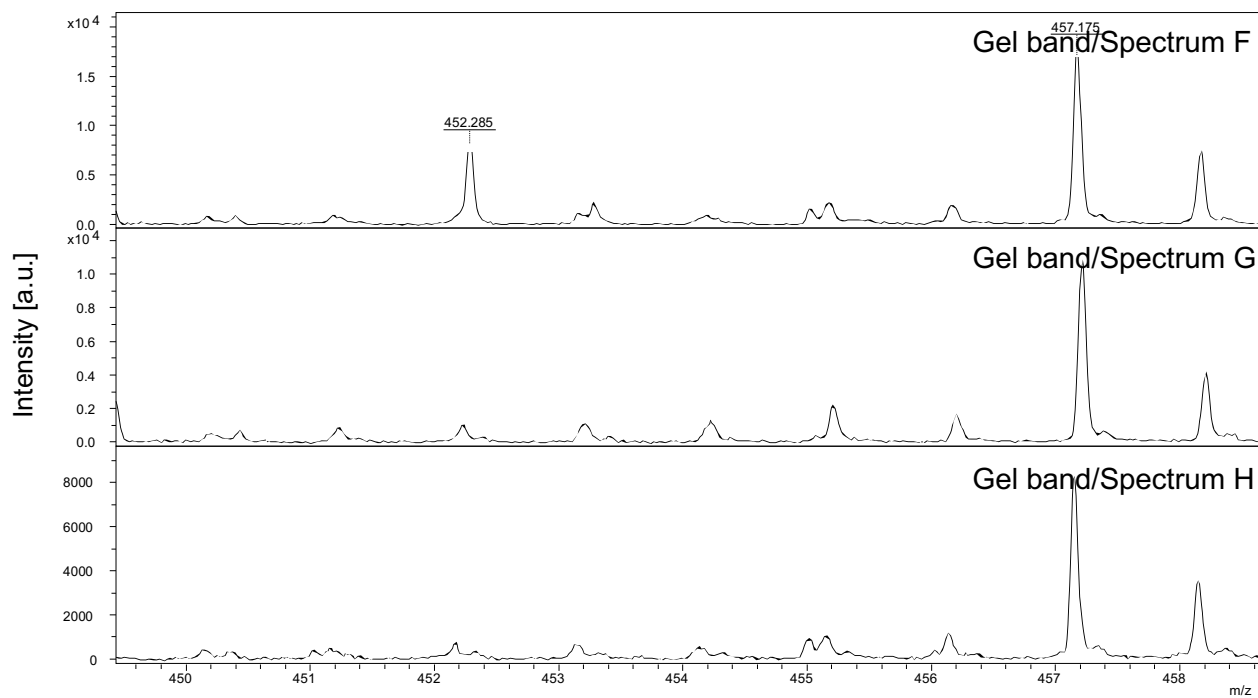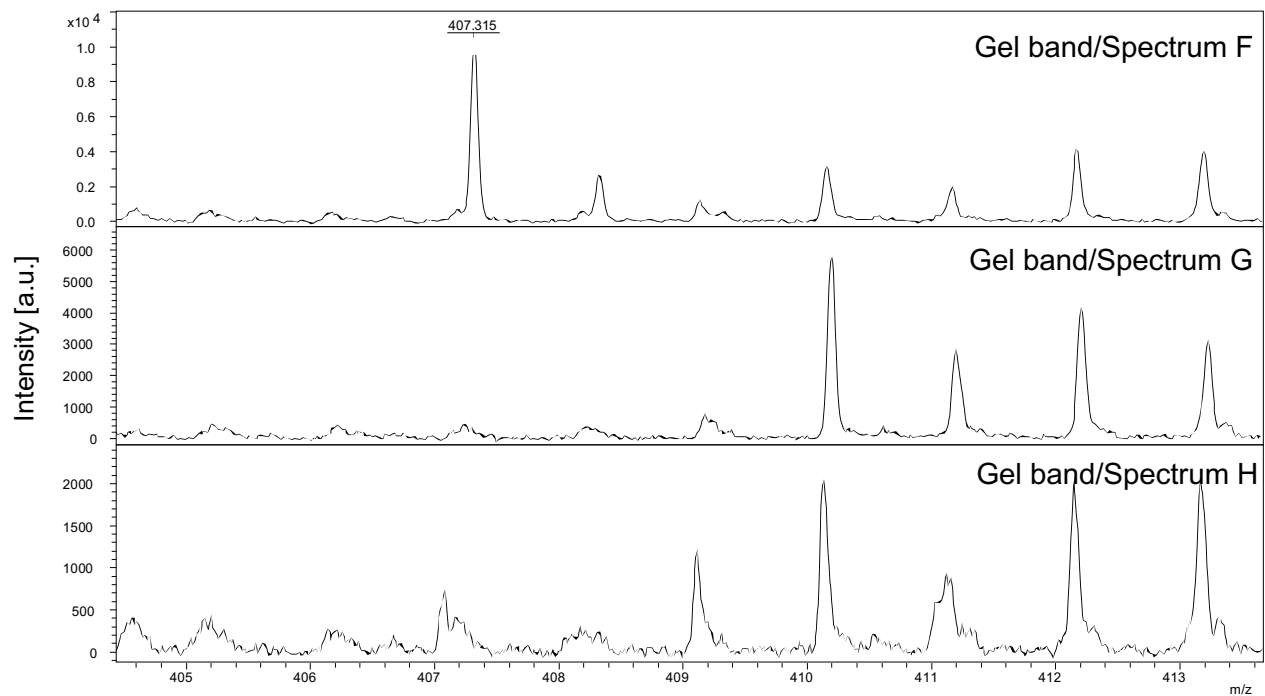

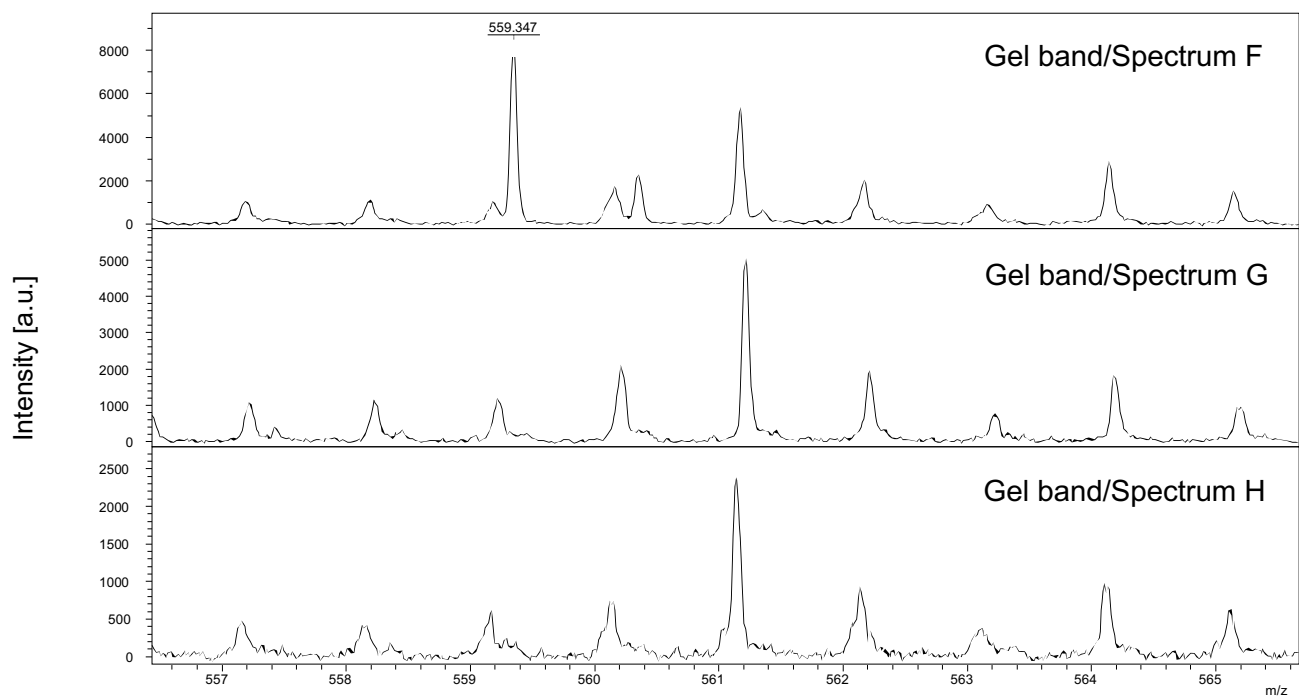



# Gel band/ Spectra I, J and K (PSM $\alpha$ 3)

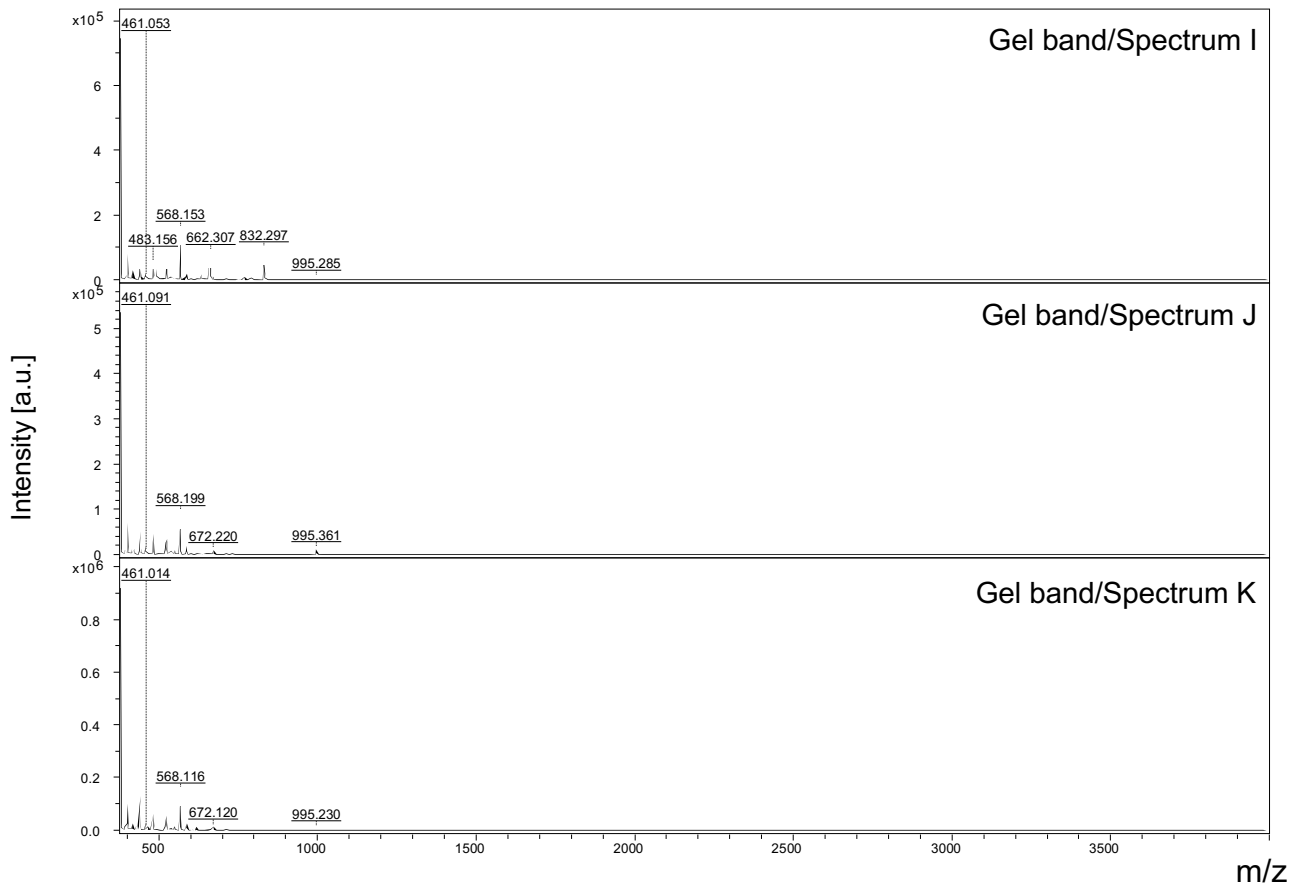

*MS spectra of in gel digested PSM $\alpha$ 3 samples. Gel band/Spectrum: I (2 kDa band), sample with 77.7  $\mu$ M PSM $\alpha$ 3; J (37 kDa band) and K (130 kDa band) sample with pooled digests of 25  $\mu$ M  $\alpha$ -syn + 0.97  $\mu$ M PSM $\alpha$ 3 and 25  $\mu$ M  $\alpha$ -syn + 77.7  $\mu$ M PSM $\alpha$ 3. The following PSM $\alpha$ 3 peptides were detected and are presented in the zoomed spectra below: LFK (aa from 7 to 9) with a theoretical mass of 407.27 Da, MEFVAK (aa from 1 to 6) with a theoretical mass of 752.36 Da are both detected in gel band I.*

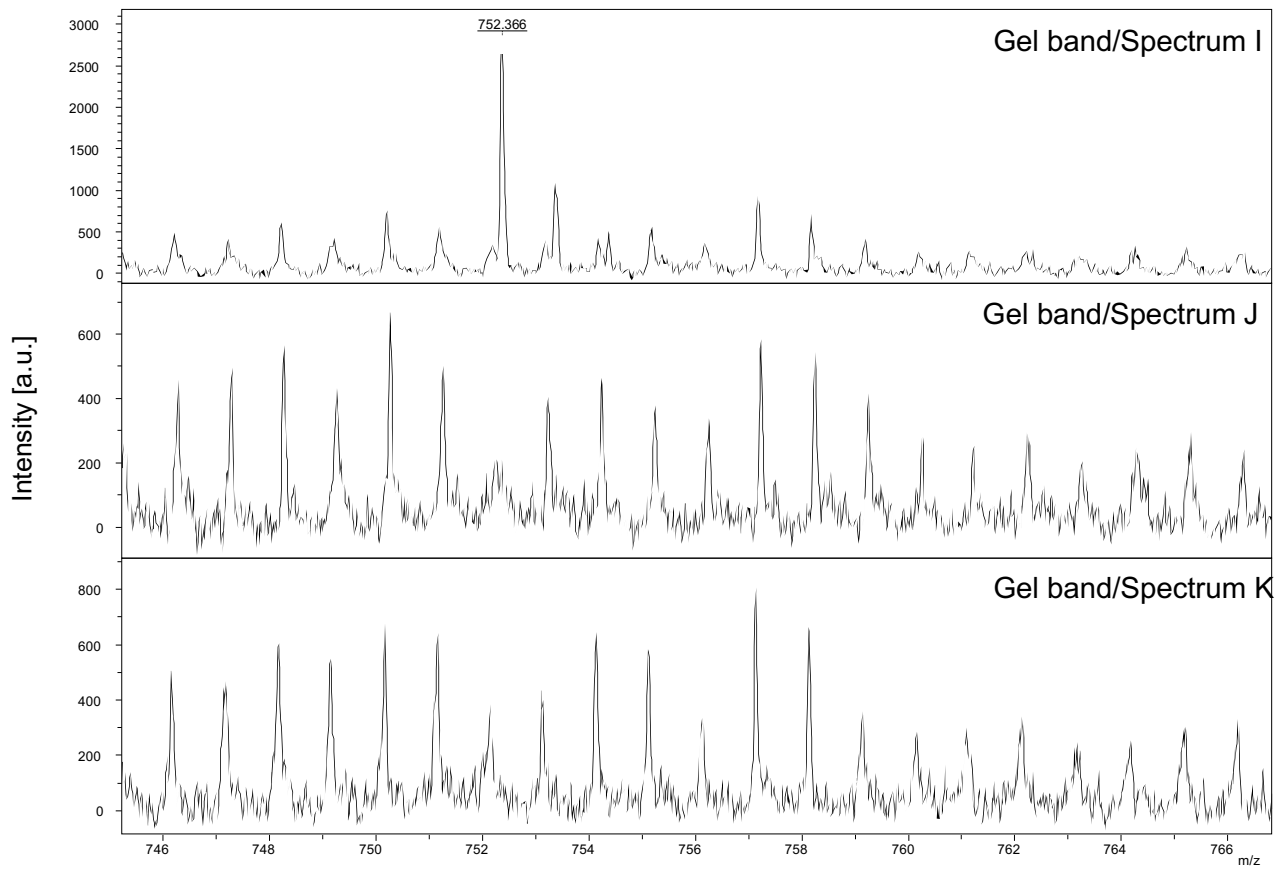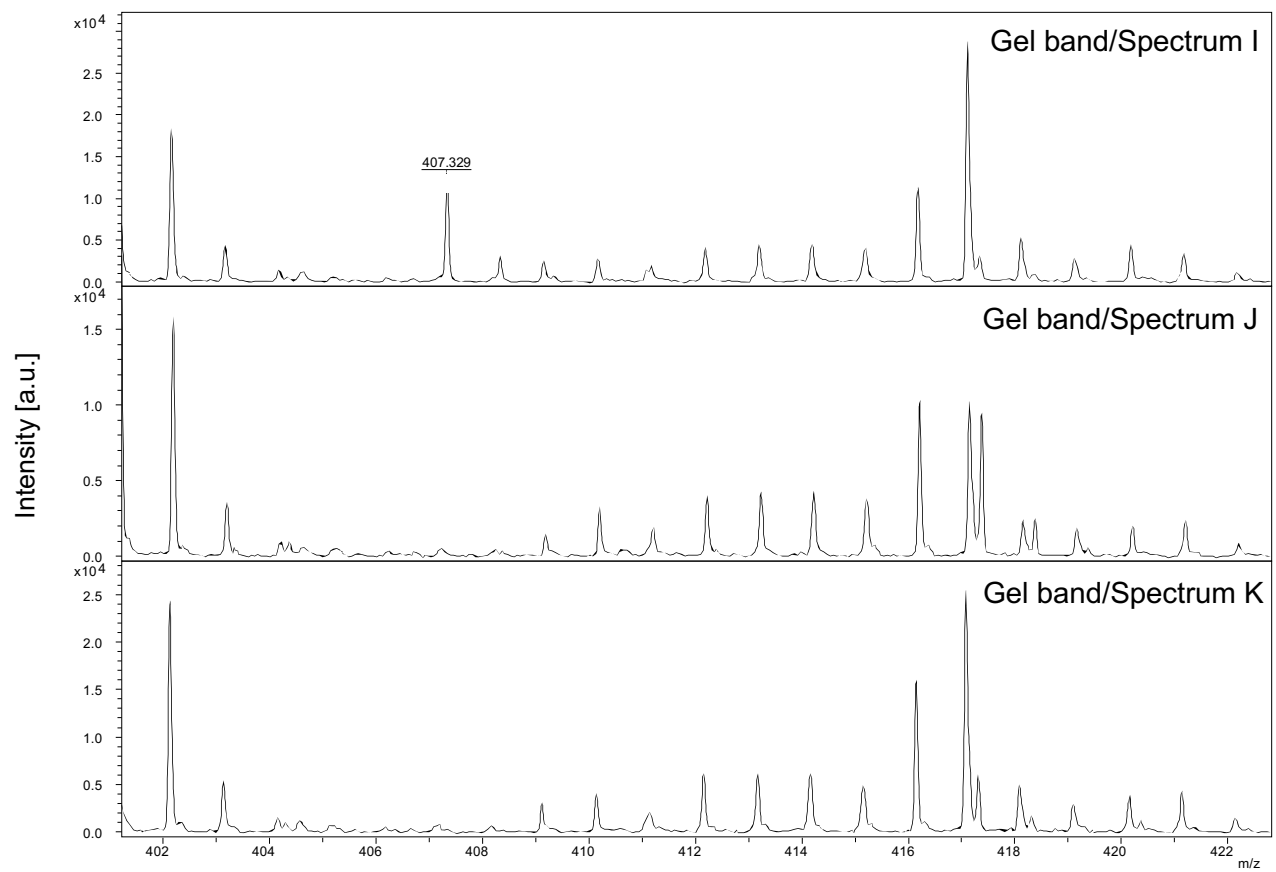

## Gel band/ Spectra L, M and N (PSM $\alpha$ 4)

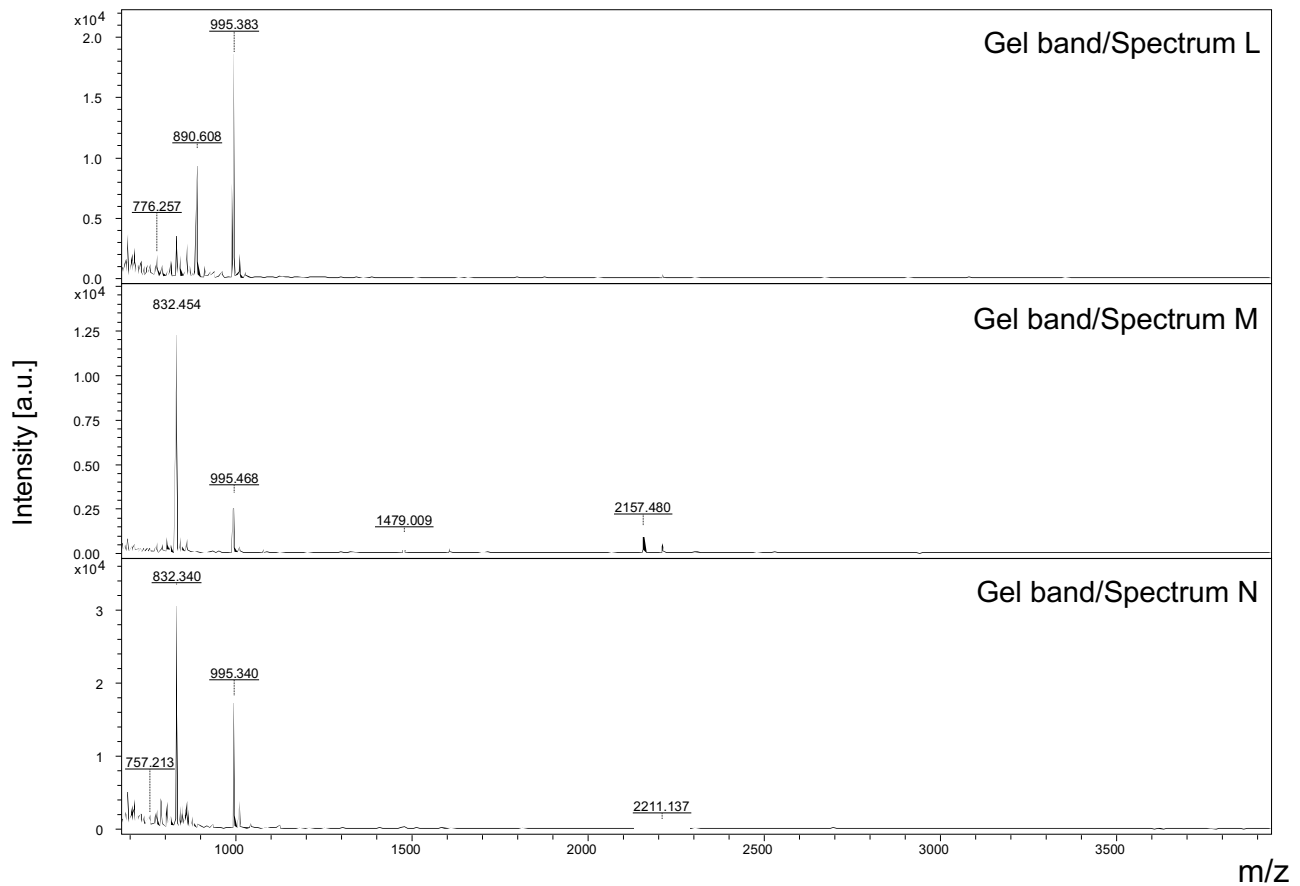

*MS spectra of in gel digested PSM $\alpha$ 4 samples. Gel band/Spectrum: L (2 kDa band), sample with 77.7  $\mu$ M PSM $\alpha$ 4; M (37 kDa band) and N (130 kDa band) sample with pooled digests of 25  $\mu$ M  $\alpha$ -syn + 0.97  $\mu$ M PSM $\alpha$ 4 and 25  $\mu$ M  $\alpha$ -syn + 77.7  $\mu$ M PSM $\alpha$ 4. The following PSM $\alpha$ 4 peptide was detected in gel band L and is presented in the zoomed spectrum below: AIIDIFAK (aa from 13 to 20) with a theoretical mass of 890.53 Da.*

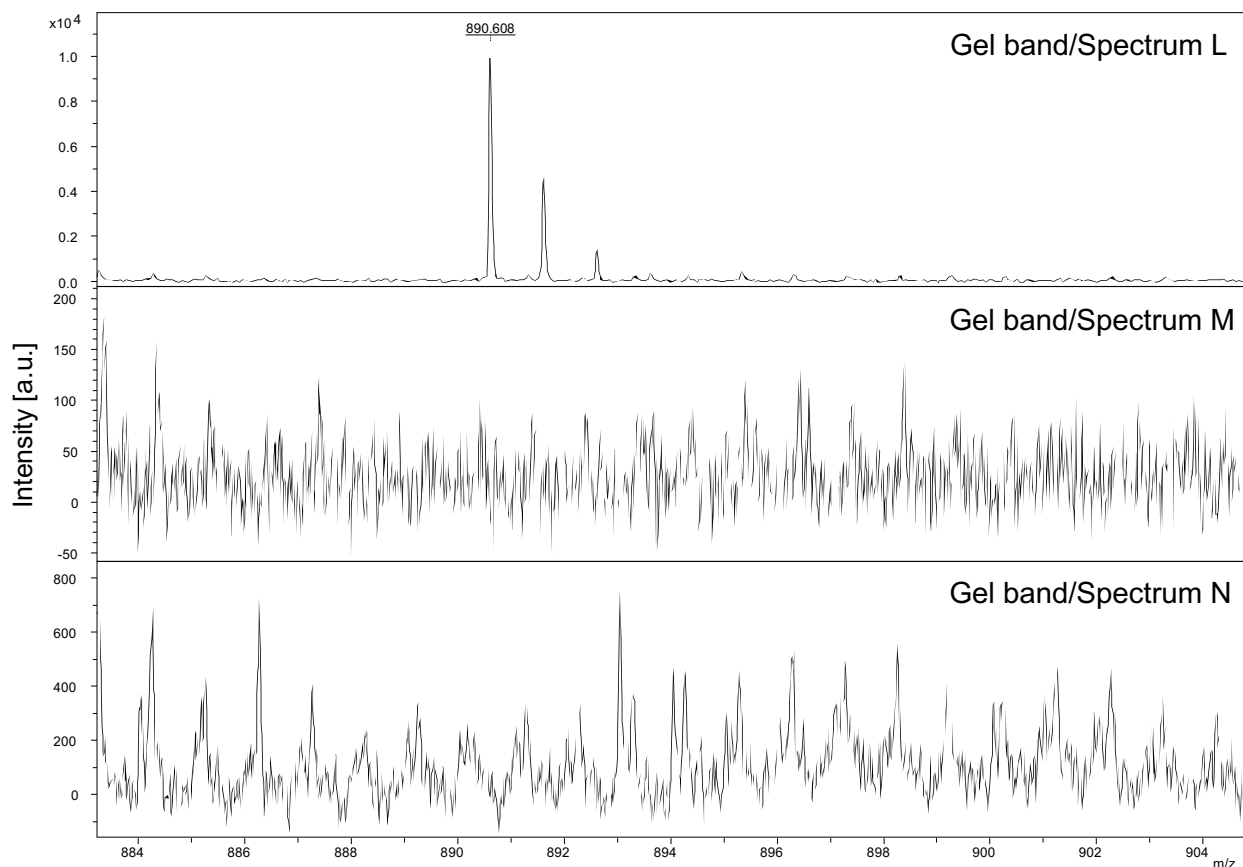

**Supplementary Figure S8. Mass Spectrometry analyses of aggregated  $\alpha$ -syn and PSM $\alpha$  peptides.** A. Samples taken at the plateau of aggregation reactions of 25  $\mu$ M  $\alpha$ -syn in the absence or presence of PSM $\alpha$  (1-4) peptides and PSM $\alpha$  (1-4) peptides incubated without  $\alpha$ -syn in 10 mM Tris, 50 mM NaCl, pH 7.6 were size separated on a Tricine SDS gel. The monomer  $\alpha$ -syn bands, monomer PSM $\alpha$  peptide bands and the 37 kDa and 120 kDa bands (as indicated on the gel) were digested and analyzed by mass spectrometry. While the expected peptides of all the PSM $\alpha$  peptides were identified in the <10 kDa bands, only  $\alpha$ -syn peptides were detected in the 37 and 120 kDa bands. B-N. The MS spectra of each of the digested bands.

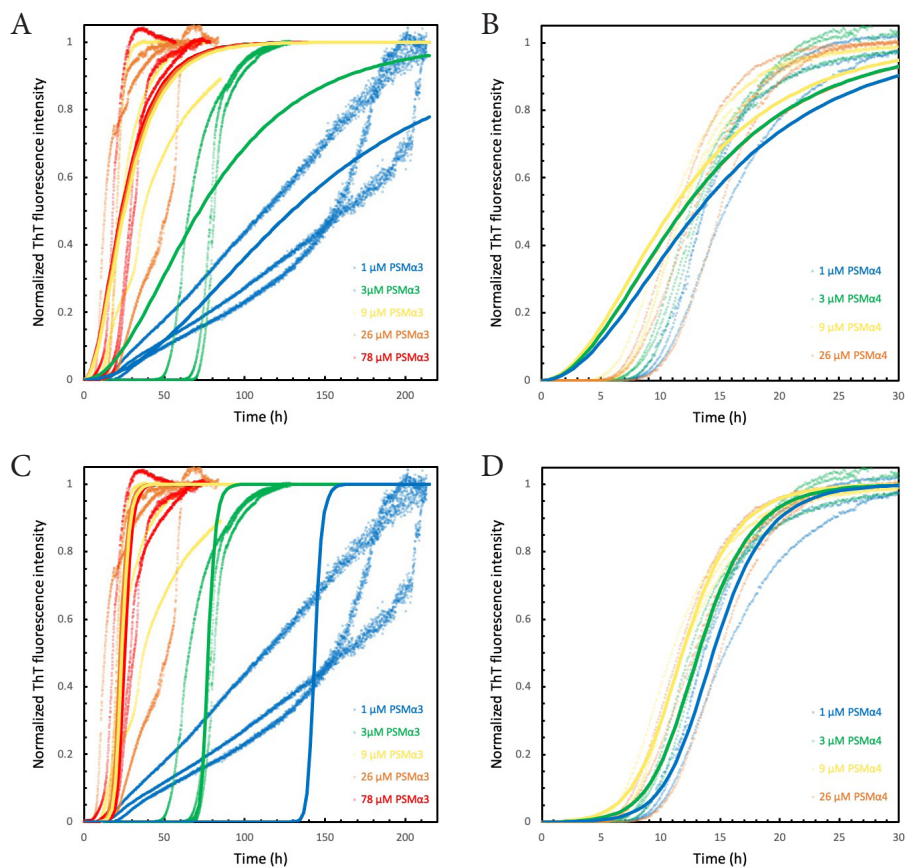

**Supplementary Figure S9. Fitting of models of nucleation and elongation to aggregation kinetics of  $\alpha\text{-syn}$  in the presence of PSM $\alpha$  peptides.**

The ThT fluorescence intensities as a function of time of 25  $\mu\text{M}$   $\alpha\text{-syn}$  aggregation induced by varying PSM $\alpha$ 3 (A, C) and PSM $\alpha$ 4 (B, D) concentrations ( $\mu\text{M}$ ) were fitted to models of primary nucleation and elongation (A, B) or to models of primary nucleation, elongation and secondary nucleation (C, D). The dotted lines are the normalized ThT fluorescence intensities and the solid lines are the fits as calculated by Amylofit. All experiments started from monomers and were performed in 10 mM Tris, 50 mM NaCl, pH 7.6 at 37  $^{\circ}\text{C}$  under quiescent conditions.

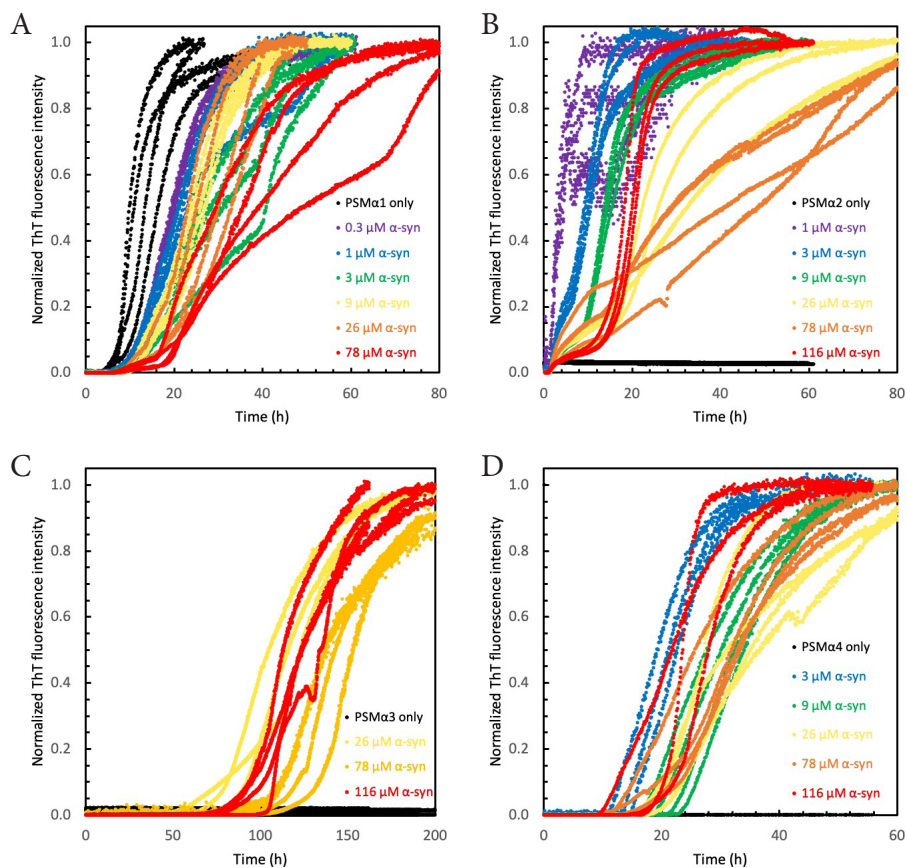

**Supplementary Figure S10. Aggregation of PSMα peptides in the absence and presence of α-syn.** Normalized ThT fluorescence intensity as a function of time for 9 μM PSMα1 (A), PSMα2 (B), PSMα3 (C) or PSMα4 (D) with varying α-syn concentrations as given in the respective panels. All experiments started from monomers and were performed in 10 mM Tris, 50 mM NaCl, pH 7.6 at 37 °C under quiescent conditions.



**Supplementary Figure S11. Electron micro-scopic images.** TEM micrographs at 60000 times magnification of samples taken at the plateau of aggregation reactions of 78  $\mu$ M PSM $\alpha$ 1 (A), PSM $\alpha$ 2 (C), PSM $\alpha$ 3 (E), PSM $\alpha$ 4 (G) peptides with 8.9% DMSO or of 25  $\mu$ M  $\alpha$ -syn in the absence (B) or presence of 9  $\mu$ M (D) PSM $\alpha$ 2 (F) PSM $\alpha$ 3 or (H) PSM $\alpha$ 4 peptides and 1.1% DMSO. All experiments started from monomers and were performed in 10 mM Tris, 50 mM NaCl, pH 7.6 at 37 °C under quiescent conditions. After deposition on the grids, the samples were labelled by an anti- $\alpha$ -syn primary antibody (syn211) and a secondary antibody linked to 10 nm gold nanoparticles. Scale bar = 200 nm

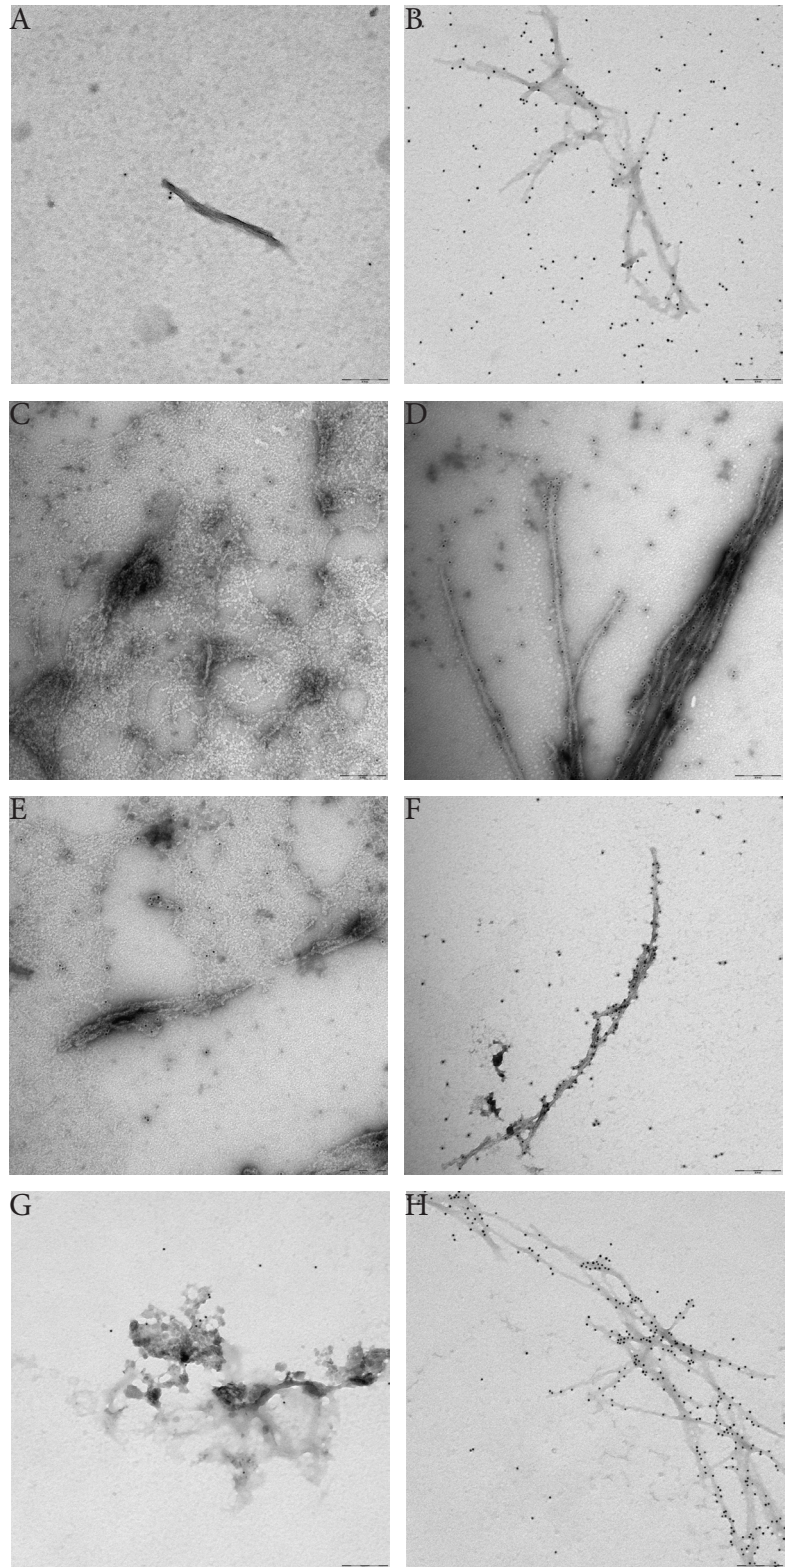

$\alpha$ -syn-GFP

pSyn

7.8  $\mu$ M PSM $\alpha$ 1

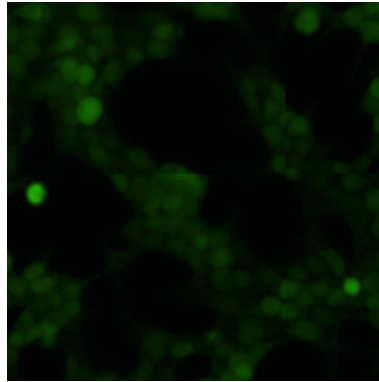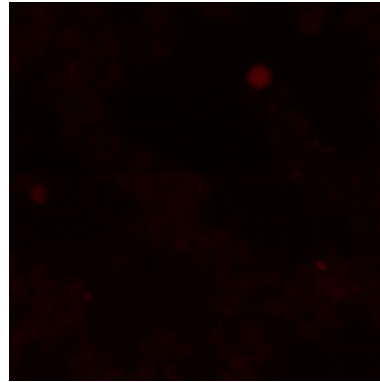

2.5  $\mu$ M  $\alpha$ -syn (1.1%  
DSMO)

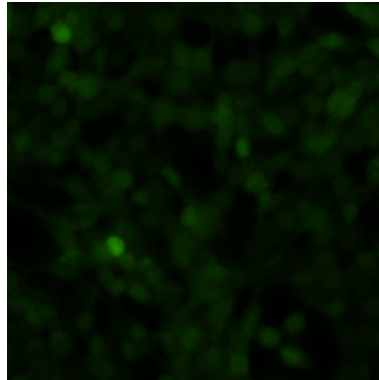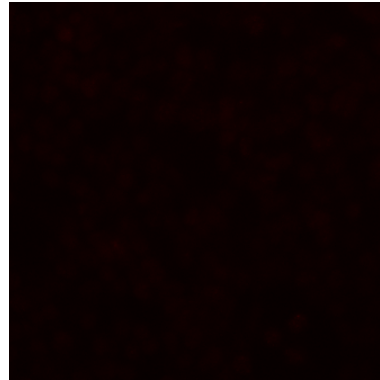

2.5  $\mu$ M  $\alpha$ -syn + 0.9  $\mu$ M  
PSM $\alpha$ 1

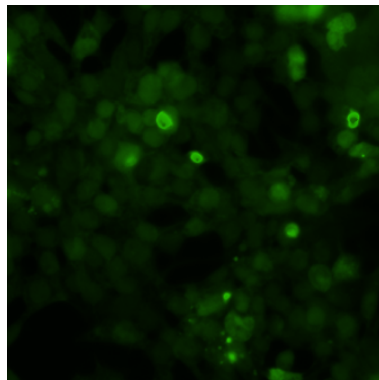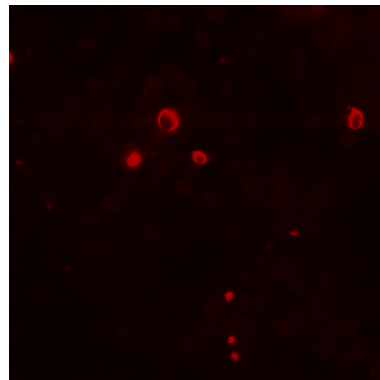

2.5  $\mu$ M  $\alpha$ -syn + 0.3  $\mu$ M  
PSM $\alpha$ 1

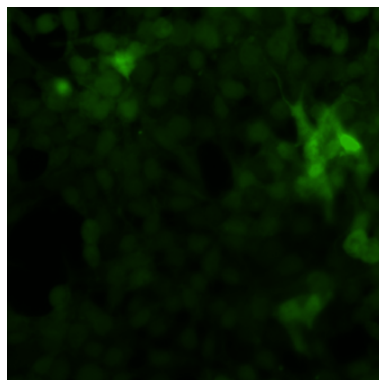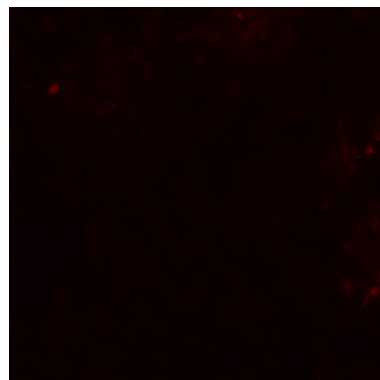

$\alpha$ -syn-GFP

pSyn

7.8  $\mu$ M PSM $\alpha$ 2

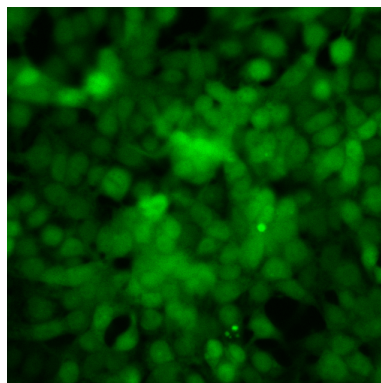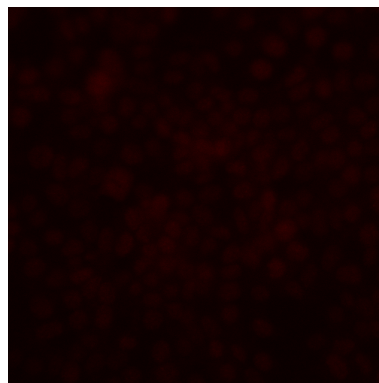

2.5  $\mu$ M  $\alpha$ -syn (1.1%  
DSMO)

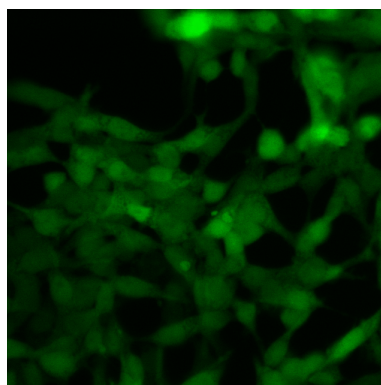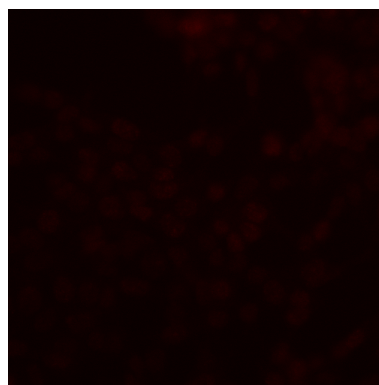

2.5  $\mu$ M  $\alpha$ -syn + 2.6  $\mu$ M  
PSM $\alpha$ 2

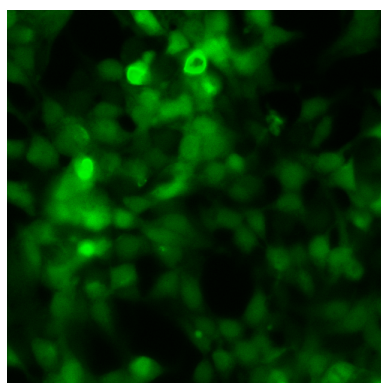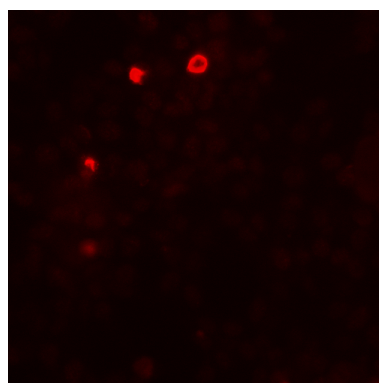

2.5  $\mu$ M  $\alpha$ -syn + 0.9  $\mu$ M  
PSM $\alpha$ 2

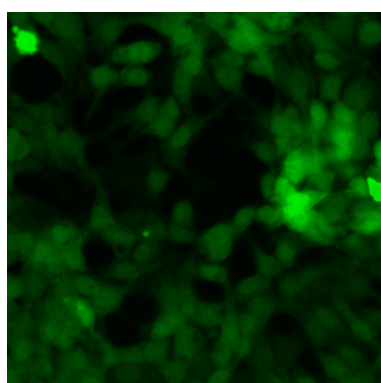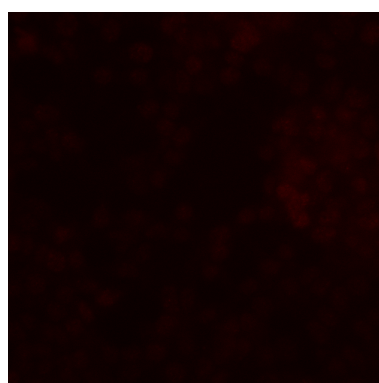

2.5  $\mu$ M  $\alpha$ -syn + 0.3  $\mu$ M  
PSM $\alpha$ 2

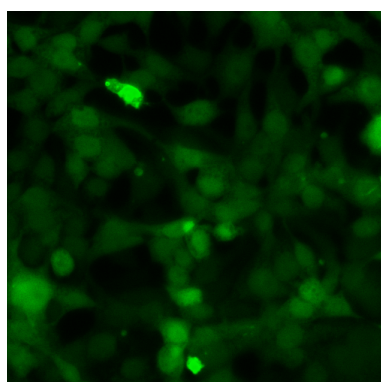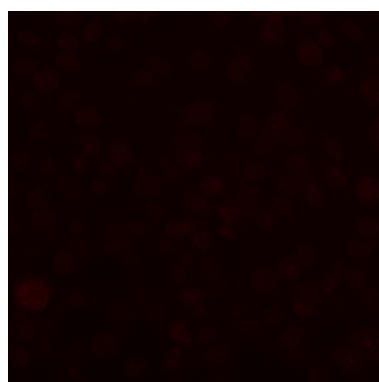



$\alpha$ -syn-GFP

pSyn

7.8  $\mu$ M PSMa3

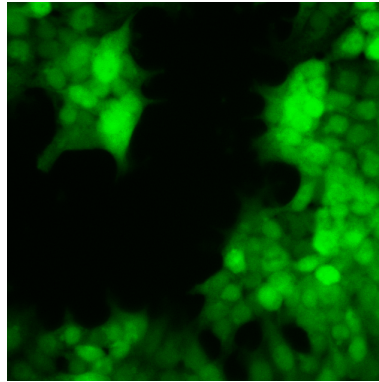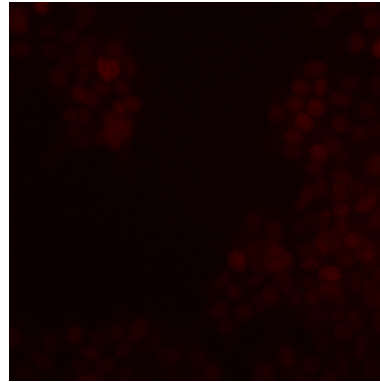

2.5  $\mu$ M  $\alpha$ -syn (1.1%  
DSMO)

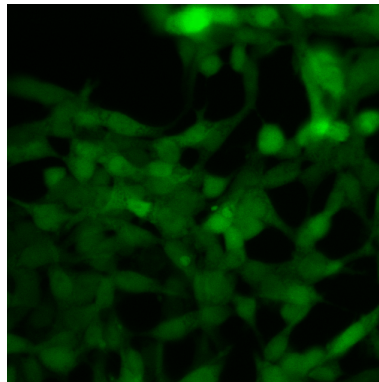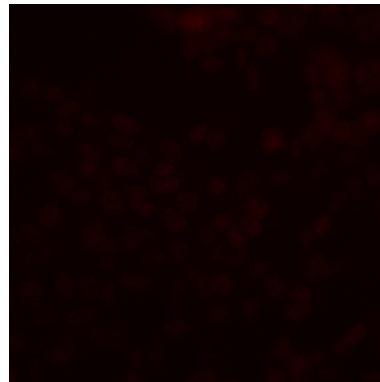

2.5  $\mu$ M  $\alpha$ -syn + 2.6  $\mu$ M  
PSMa3

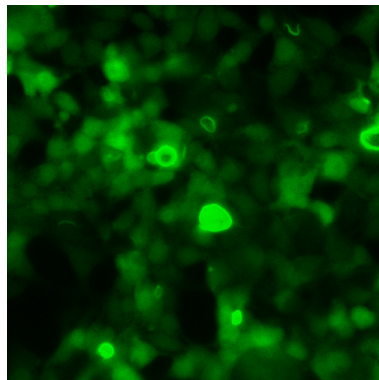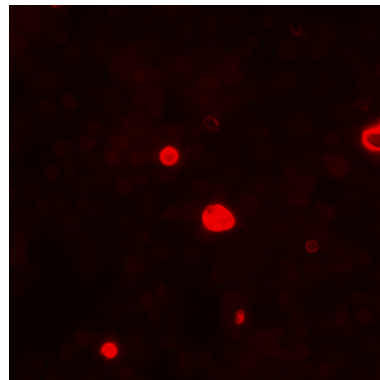

2.5  $\mu$ M  $\alpha$ -syn + 0.9  $\mu$ M  
PSMa3

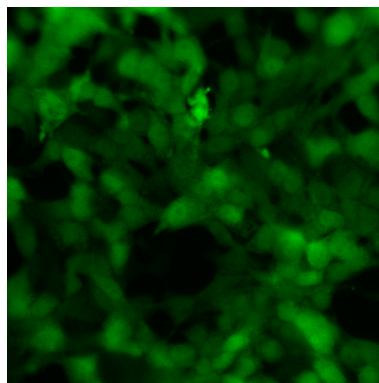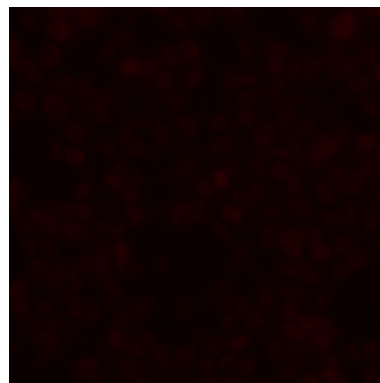

2.5  $\mu$ M  $\alpha$ -syn + 0.3  $\mu$ M  
PSMa3

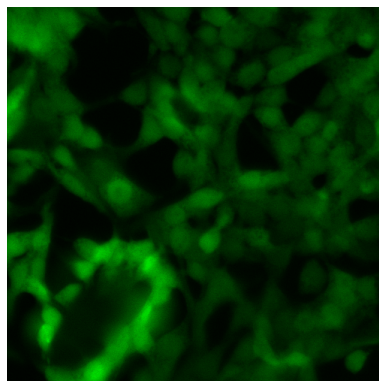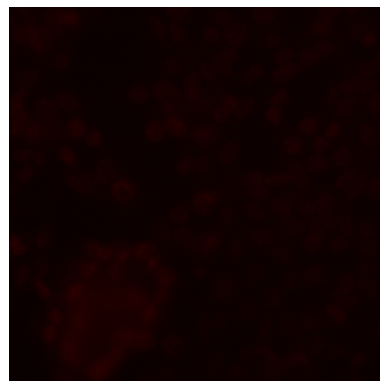

$\alpha$ -syn-GFP

pSyn

7.8  $\mu$ M PSM $\alpha$ 4

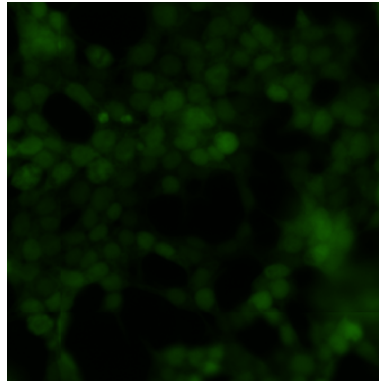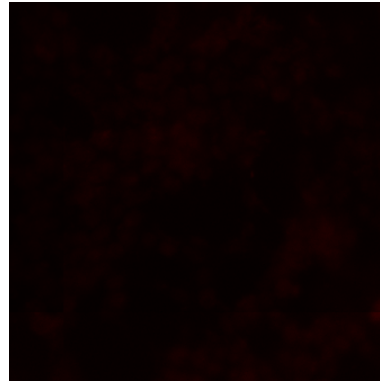

2.5  $\mu$ M  $\alpha$ -syn (1.1%  
DSMO)



2.5  $\mu$ M  $\alpha$ -syn + 0.9  $\mu$ M  
PSM $\alpha$ 4

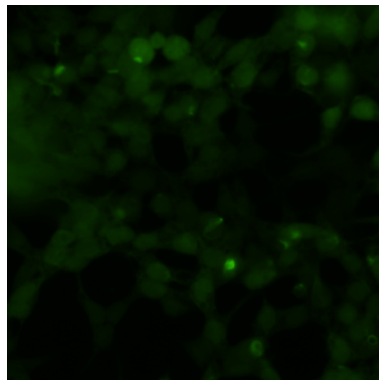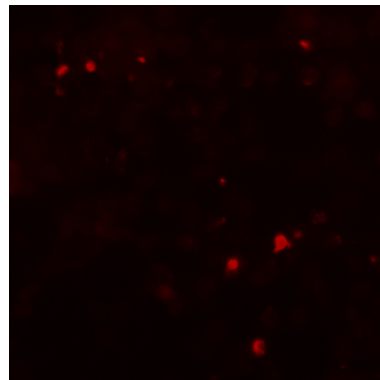

2.5  $\mu$ M  $\alpha$ -syn + 0.3  $\mu$ M  
PSM $\alpha$ 4

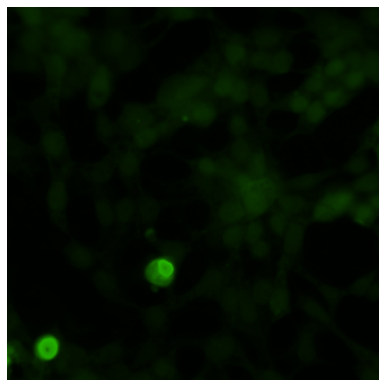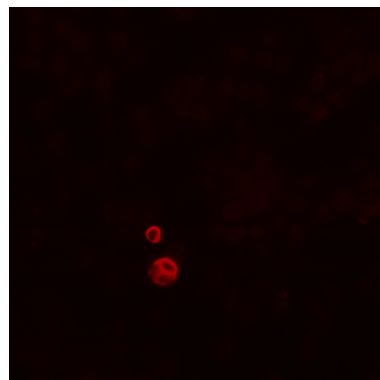

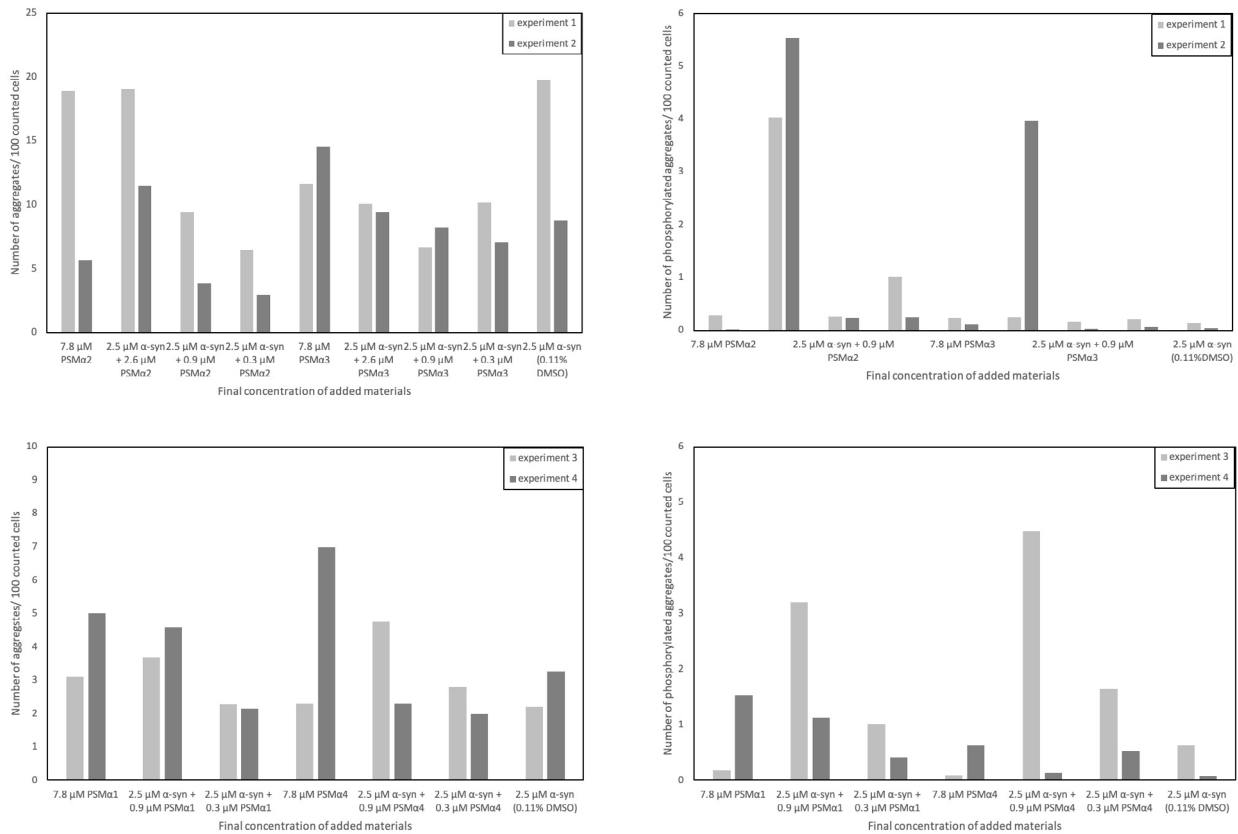

**Supplementary Figure S12. Seeding in HEK A53T-GFP cells.** HEK cells were stained for  $\alpha$ -syn phosphorylated at ser129 and a Cy3-conjugated secondary antibody after 48 hour-treatment with  $\alpha$ -syn aggregated in the absence or presence of PSM $\alpha$  peptides at different concentrations. Representative images from one well from each treatment condition are shown. These experiments were repeated twice. The number of aggregates and phosphorylated aggregates were quantified per 100 counted cells. The averages from all replicate wells (3-4/experiment) are shown for each experiment. The representative images shown are from experiments 2 and 3.
